# FilamentID reveals the composition and function of metabolic enzyme polymers during gametogenesis

## Authors

Jannik Hugener<sup>†1,2,3</sup>, Jingwei Xu<sup>†1</sup>, Rahel Wettstein<sup>2,3</sup>, Lydia Ioannidi<sup>3</sup>, Daniel Velikov<sup>3,4</sup>, Florian Wollweber<sup>1</sup>, Adrian Henggeler<sup>2,3</sup>, Joao Matos<sup>2,3\*</sup> and Martin Pilhofer<sup>1\*</sup>

## Affiliations

<sup>1</sup>Institute of Molecular Biology and Biophysics, ETH Zürich, 8093 Zürich, Switzerland.

<sup>2</sup>Institute of Biochemistry, ETH Zürich, 8093 Zürich, Switzerland.

<sup>3</sup>Max Perutz Labs, University of Vienna, 1030 Vienna, Austria.

<sup>4</sup>Vienna BioCenter PhD Program, Doctoral School of the University of Vienna and Medical University of Vienna, 1030 Vienna, Austria.

<sup>†</sup> both authors contributed equally to this work

\*corresponding authors: [joao.matos@univie.ac.at](mailto:joao.matos@univie.ac.at) and [pilhofer@biol.ethz.ch](mailto:pilhofer@biol.ethz.ch)

## 1 **SUMMARY**

2 Gamete formation and subsequent offspring development often involve extended phases of suspended  
3 cellular development or even dormancy. How cells adapt to recover and resume growth remains poorly  
4 understood. Here, we visualized budding yeast cells undergoing meiosis by cryo-electron tomography  
5 (cryoET) and discovered elaborate filamentous assemblies decorating the nucleus, cytoplasm, and  
6 mitochondria. To determine filament composition, we developed a “Filament IDentification”  
7 (FilamentID) workflow that combines multiscale cryoET/cryo-electron microscopy (cryoEM) analyses  
8 of gently lysed cells. FilamentID identified the mitochondrial filaments as the conserved aldehyde  
9 dehydrogenase Ald4<sup>ALDH2</sup> and the nucleoplasmic/cytoplasmic filaments being composed of acetyl-CoA  
10 synthetase Acs1<sup>ACSS2</sup>. The near-native high-resolution structures revealed the mechanism underlying  
11 polymerization and enabled us to perturb filament formation. Acs1 polymerization facilitates the  
12 recovery of chronologically aged spores, and more generally, the cell cycle re-entry of starved cells.  
13 FilamentID is broadly applicable to characterize filaments of unknown identity in diverse cellular  
14 contexts.  
15

## 16 **HIGHLIGHTS**

- 17 • FilamentID: a multiscale imaging workflow to characterize cellular filaments of unknown  
18 composition
- 19 • The conserved aldehyde dehydrogenase Ald4<sup>ALDH2</sup> polymerizes into filament arrays within meiotic  
20 mitochondria
- 21 • The conserved acetyl-CoA synthetase Acs1<sup>ACSS2</sup> forms filament arrays in the nucleus and the  
22 cytoplasm
- 23 • Metabolites mediate Acs1 polymerization to store Acs1 in an inactive state in gametes and starved  
24 cells
- 25 • Acs1 filament formation is required for efficient return to growth from starvation stress
- 26

## 27 INTRODUCTION

28 Most organisms live in rapidly changing environments and frequently experience adverse conditions for  
29 growth and reproduction. In microorganisms, one common response to environmental stress is the  
30 reversible entry into a dormant state, in which cells reduce their metabolic activity and arrest  
31 proliferation. Dormancy can also involve the execution of specialized developmental programs that  
32 result in differentiated cell types, such as spores, which can withstand nutrient scarcity, non-optimal  
33 temperatures, or desiccation. The formation of dormant cells typically relies on extensive remodeling of  
34 the cellular architecture, including, amongst others, changes in cell size, cell envelope structure, or  
35 cytoplasmic density and composition<sup>1,2</sup>. These ultrastructural adaptations are thought to enable cells to  
36 enter, maintain, and recover from dormancy, but their underlying molecular mechanisms remain poorly  
37 understood.

38 A hallmark feature of cellular dormancy is a decrease in metabolic activity<sup>1</sup>. In addition to the  
39 downregulation of enzyme function through the modulation of gene expression, an emerging concept  
40 posits that metabolic activity can be spatiotemporally controlled by enzyme self-assembly into  
41 filamentous polymers or agglomerates. Subcellular compartmentalization of metabolic enzymes  
42 mediated by self-association has been observed in different domains of life and has often been associated  
43 with cellular starvation<sup>3-9</sup>. In the budding yeast *Saccharomyces cerevisiae*, genome-wide fluorescence  
44 light microscopy screens have revealed a surprisingly high number of enzymes that form punctate or  
45 rod-shaped structures in response to the metabolic state of the cell<sup>10-13</sup>. Notable examples include the  
46 cytidine triphosphate synthase CTP<sup>14,15</sup>, the glutamine synthetase Gln1<sup>16</sup>, the translation initiation factor  
47 eIF2B<sup>17</sup>, or the glucokinase Glk1<sup>18</sup>. In all four cases, filament formation has been proposed to play  
48 important roles in the regulation of enzyme activity and, as such, to be of relevance for cell physiology.  
49 Even though biochemical reconstitution approaches coupled with structural studies have begun to shed  
50 light on the mechanistic basis of filament organization, it remains challenging to ascertain filament  
51 structural organization in the cellular context. Moreover, whether filament formation occurs and plays  
52 specialized roles in other biological contexts, for example when cells enter prolonged periods of  
53 developmental arrest or dormancy after gametogenesis, remains to be determined.

54 In many sexually reproducing organisms, including budding yeast, cells enter gametogenesis as a natural  
55 response to nutrient deprivation, resulting in the production of highly differentiated spores<sup>19</sup>. The  
56 principal features of meiosis are evolutionarily conserved and include a single round of DNA replication,  
57 followed by two consecutive nuclear divisions, termed meiosis I and meiosis II<sup>20</sup>. At the completion of  
58 meiosis, a haploid DNA complement, cytoplasmic content, and organelles are inherited by four arising  
59 gametes, which are protected by a thick spore wall. The resistant spores remain viable in a dormant state,  
60 preserving the potential to resume growth after encountering favorable environments<sup>19</sup>. How spores



61 preserve all essential cellular components required for the resumption of growth over potentially very  
62 long periods of time remains unclear.

63 Here, we have used cryo-electron tomography (cryoET) imaging to study budding yeast cells throughout  
64 gametogenesis, since it allows the visualization of mesoscale assemblies in their cellular context in a  
65 near-native state<sup>21,22</sup>. We discovered distinct types of previously uncharacterized filament assemblies in  
66 different cellular compartments. Since the identification of such structures by cryoET remains  
67 exceptionally challenging, we developed a workflow to image gently lysed cells by employing a  
68 combination of cryoET and single-particle cryo-electron microscopy (cryoEM), which we have termed  
69 FilamentID. By enabling us to obtain high-resolution structures in near-native conditions, FilamentID  
70 allowed the unambiguous identification of two distinct types of polymerized metabolic enzymes.  
71 Targeted mutations and downstream functional experiments suggest that metabolic enzyme  
72 polymerization is induced during starvation and required for efficient gamete awakening after prolonged  
73 dormancy.

74

## 75 RESULTS

### 76 Filament assemblies form in mitochondria, nucleus, and cytoplasm of yeast cells undergoing 77 gametogenesis

78 We set out to visualize ultrastructural adaptations of cells undergoing gametogenesis upon nutrient  
79 starvation. To this end, we synchronized diploid *S. cerevisiae* cells at G0/G1 through gradual starvation  
80 and induced meiosis by transferring the cultures into sporulation medium (SPM) lacking a nitrogen  
81 source, as previously described (Figure S1A)<sup>23,24</sup>. Fluorescence activated cell sorting (FACS analysis)  
82 of DNA content showed that most cells were in G0/G1 prior to transfer to SPM and efficiently underwent  
83 DNA replication between two and four hours after induction of meiosis (Figure S1B). For imaging in a  
84 near-native state, meiotic cells were plunge-frozen on EM grids, thinned by cryo-focused ion beam  
85 (cryoFIB) milling, and imaged by cryoET<sup>25</sup>. To reduce cell-to-cell variability that could arise from  
86 asynchronous meiotic progression, in an initial step we used prophase I-arrested cultures (*ndt80Δ*)<sup>26</sup>  
87 that were collected eight hours after induction of meiosis.

88 We observed various filamentous assemblies in different sub-cellular compartments (Figure 1A-C). One  
89 type of filament was frequently observed in mitochondria, hereafter referred to as “mitochondrial  
90 filament.” In longitudinal views, these filaments appeared straight and were often bundled together.  
91 Cross-sections in the representative cryo-tomogram revealed that the filament bundles were ordered in  
92 arrays of ~40 individual filaments. A second type of filament was found in the nucleus and in the  
93 cytoplasm, hereafter referred to as “nucleocytoplasmic” filament. These nucleocytoplasmic filaments  
94 were also arranged in filament bundles, however, the organization appeared more heterogeneous and  
95 complex, with some filaments branching away from the bundles. Cross-sections of individual  
96 nucleocytoplasmic filaments showed a triangular architecture.

97 Quantification of the two filament types revealed that mitochondrial filaments were present in ~28% of  
98 the imaged mitochondria (n = 23/81), and nucleocytoplasmic filaments in ~7% of the tomograms  
99 containing nuclear volume (n = 2/29) and ~4% of the tomograms containing cytoplasmic volume (n =  
100 3/76) (Figure 1D). Importantly, no filaments were observed in mitotically dividing cells grown in rich  
101 medium, indicating that meiosis, or the process of starvation-induced gametogenesis, may drive the  
102 formation of such structures.

### 103 FilamentID: a workflow to identify cellular filaments of unknown molecular composition

104 Conventional approaches to identify filaments seen *in cellulo* would be either A) the generation of high-  
105 resolution sub-tomogram averages, or B) the purification of the filaments followed by downstream  
106 single-particle cryoEM analyses. For the identification of filaments, both approaches are very  
107 challenging, since the abundance of the filaments is relatively low and their identities are unknown. We

108 therefore developed a “Filament IDentification” (FilamentID) workflow that is applicable to low-  
109 abundance targets (problematic for approach “A”) and that circumvents the need for purification of the  
110 complex of interest (required for approach “B”). One critical aspect of the workflow entails the  
111 preparation of the sample such that it can be imaged without the need for cryo-sample thinning. Towards  
112 this goal, we adapted a chromosome surface spreading protocol<sup>27,28</sup> to gently lyse and “spread” either  
113 isolated organelles or entire cells onto EM grids. Since cell envelope and organelle integrity become  
114 partially disrupted, the cellular contents are diluted, making intracellular complexes directly accessible  
115 for a combination of cryoET and single-particle cryoEM imaging.

116 The workflow features two variations for the identification of filaments in mitochondria or  
117 nucleoplasm/cytoplasm, respectively (Figure 2). Step 1: Cells are spheroplasted by digesting the cell  
118 wall with Zymolyase. For the identification of mitochondrial filaments, mitochondria are then purified  
119 and spread onto EM grids by hypo-osmotic swelling. For the identification of nucleocytoplasmic  
120 filaments, entire spheroplasts are spread onto an EM grid by hypo-osmotic swelling and the addition of  
121 a mild detergent. Step 2: Grids are vitrified by plunge-freezing. Step 3: Samples are subjected to data  
122 collection. Each sample is imaged by recording tilt-series for cryoET, as well as 2D projection images  
123 for targeted single-particle cryoEM. Step 4: CryoET data is used to generate low-resolution sub-  
124 tomogram averages to assess filament symmetry. The single-particle data are used to generate high-  
125 resolution maps by helical reconstruction, based on the symmetry information determined by cryoET.  
126 Step 5: Integrating the cryoEM data with structure prediction, structure databases, and proteomic  
127 analyses allows for the unambiguous identification of the filament components. Step 6: Structural  
128 findings are validated by genetically interfering with filament polymerization. The resulting point  
129 mutants can be used in functional assays to reveal the role of filament formation. We note that the  
130 imaging of entire spread spheroplasts would also be fully compatible with the identification of  
131 mitochondrial filaments. However, the mitochondrial purification step is useful in order to reduce the  
132 workload in steps 3-5.

### 133 **The conserved mitochondrial aldehyde dehydrogenase Ald4 polymerizes into filaments**

134 We first applied FilamentID to characterize the mitochondrial filaments. To determine whether we could  
135 preserve the filament arrays after organelle purification, we imaged isolated mitochondria by cryoET.  
136 We observed the characteristic mitochondrial double membrane, cristae decorated with F<sub>0</sub>F<sub>1</sub>-ATP  
137 synthase, as well as individual filaments and ordered filament arrays (Figure 3A and S2). Sub-tomogram  
138 averaging of the filaments revealed a repetitive two-fold symmetric architecture that matches the *in*  
139 *cellulo* observations (Figure 1A-C and 3B).

140 Next, we collected single-particle cryoEM data of spread mitochondria. Due to the heterogeneous  
141 distribution of the filaments on the grid, we employed a targeted single-particle cryoEM data collection  
142 strategy, where we extensively screened grid squares at low magnification, followed by high-

143 magnification data collection (Figure 3C). As detailed below, due to the repetitive architecture of the  
144 filaments, a small dataset of several hundred micrographs was sufficient for filament identification. For  
145 helical reconstruction, we used the symmetry information obtained from sub-tomogram averaging as a  
146 starting point to interpret the helical parameters of the filament in real space (Figure 2). We determined  
147 an initial filamentous structure at 6.8 Å resolution (Figure S3A). As the resolution was not sufficient to  
148 trace the C $\alpha$ -backbone, we employed structural dockings of AlphaFold-predicted mitochondrial proteins  
149 <sup>29,30</sup>. To identify potential candidates, we have used mass spectrometry (MS) analysis in a parallel study  
150 to characterize the meiotic proteome <sup>31</sup>, which revealed that various mitochondrial matrix/inner  
151 membrane components <sup>32</sup> are upregulated at the onset gametogenesis (Figure S4A). Out of 30 candidate  
152 proteins, we identified the metabolic enzyme aldehyde dehydrogenase 4 (Ald4) as the most likely  
153 filament component (Figure S4B). Based on the knowledge that aldehyde dehydrogenases form  
154 tetramers <sup>33</sup>, we further performed 2D classification and found that the repeating subunits polymerize in  
155 two distinct modes, helical and non-helical (Figure S3B). Therefore, we then treated the central part of  
156 the helical segments as individual particles and determined the Ald4 tetramer at a final resolution of 3.8  
157 Å (Figure S3C-D). Ald4 tetramers can stack together to form a helical filament architecture (rise = 83  
158 Å, twist = ~180°), which fitted our map from sub-tomogram averaging (Figure S4C). Moreover, Ald4  
159 tetramers could also assemble in a head-to-head and tail-to-tail fashion (non-helical mode) (Figure 3D  
160 and S3B-C).

161 To validate the presence of Ald4 in the filaments, we first analyzed the reconstructed map and found  
162 that it was incompatible with other Ald isoforms present in yeast (Figure S3E, S4D & Table S1). In  
163 addition, we generated an *ALD4* deletion mutant (*ald4Δ*), isolated mitochondria from meiotic cells, and  
164 imaged them using cryoET. In *ald4Δ* strains, we did not observe any filaments in mitochondria (n =  
165 0/77), whereas ~14% of the mitochondria from wild-type cells contained filaments (n = 10/71) (Figure  
166 S4E).

167 To understand how Ald4 assembles into filaments, we exploited the tetramer stacking interfaces and  
168 identified eight residues that potentially mediate filament polymerization (Figure 3E). We mutated these  
169 eight residues and tested if strains expressing the interface mutations (*ald4<sup>int</sup>*) could form filaments in  
170 isolated mitochondria. Notably, we did not detect any filaments in the *ald4<sup>int</sup>* mitochondria (n = 0/28),  
171 whereas ~15% of the mitochondria from the *ALD4<sup>WT</sup>* control strain contained filaments (n = 5/33)  
172 (Figure 3F). Western blotting showed that the expression levels of GFP-tagged *ALD4<sup>WT</sup>* and the *ald4<sup>int</sup>*  
173 mutant were comparable (Figure 3G), suggesting that the interface mutations prevent filament assembly  
174 without affecting the general stability of the protein.

175 In summary, our workflow unambiguously identified the mitochondrial filament arrays as  
176 homopolymers of Ald4, and we report the first high-resolution structure of a eukaryotic polymerized  
177 aldehyde dehydrogenase enzyme. Our filament identification is consistent with a previous report of  
178 elongated inclusion bodies observed by conventional EM, which co-localized with Ald4 antibodies in

179 immuno-gold staining<sup>34</sup>. An accompanying paper<sup>31</sup> presents a characterization of the role of Ald4  
180 polymerization during yeast gametogenesis.

## 181 **The conserved acetyl-CoA synthetase Acs1 forms filament assemblies in the nucleus and the** 182 **cytoplasm**

183 We then applied FilamentID to characterize the nucleocytoplasmic filament assemblies (Figure 1 A-C).  
184 To this end, we spread entire meiotic yeast cells directly on EM grids and plunge-froze them (Figure 2).  
185 Spread spheroplasts appeared as disc-shaped densities, with ~4  $\mu\text{m}$  diameter in low magnification  
186 images (Figure S5A). Cryo-tomograms of spreads revealed not only a variety of different filament types,  
187 but also other well-preserved molecular superstructures, such as spindle pole bodies connected via  
188 microtubules (Figure S5A-B). Interestingly, the nucleocytoplasmic filaments were seen both as  
189 individual filaments and organized as complex bundles (Figure 4A). In some of the tomograms we also  
190 observed potential (dis-) assembly intermediates, where small filaments appear to converge into a large  
191 filament bundle (Figure S5C). Sub-tomogram averaging of individual filaments revealed a triple-helical  
192 complex with 5.5 nm ladder-like repeats (Figure 4B). The triangular shape of the averaged volume, as  
193 well as the overall bundle organization resembled our initial observations *in cellulo* (Figure 1A-C).

194 To complement the cryoET data, we applied targeted single-particle cryoEM data collection (Figure  
195 4C), followed by helical reconstruction (Figure S6A-B). This allowed us to obtain a filament structure  
196 at ~3.5  $\text{\AA}$  resolution (Figure S6C-D), which was sufficient to directly trace the C $\alpha$ -backbone of one  
197 subunit. The backbone model was manually built and was then subjected to the Dali server<sup>35</sup>, which  
198 revealed the metabolic enzyme acetyl-coenzyme A synthetase 1 (Acs1) as a strong candidate.

199 To validate that the filament consists of Acs1 and not Acs2, a second isoform present in yeast, we  
200 compared their sequences and analyzed densities of characteristic residues in our atomic model (Figure  
201 S6E, Figure S7A & Table S1). In addition, we generated an *ACS1* deletion mutant (*acs1 $\Delta$* ) and  
202 performed cryoET on the spread spheroplasts of meiotic cells. We did not observe any  
203 nucleocytoplasmic filament bundles in spreads from *acs1 $\Delta$*  spheroplasts ( $n = 0/80$ ), while ~32% of the  
204 wild-type spheroplasts contained filament bundles ( $n = 20/63$ ) (Figure S7B).

205 The filament architecture consists of layers of Acs1 trimers, which are related to consecutive layers  
206 through a helical operation (rise = 53.61  $\text{\AA}$ , twist = 13.03 $^\circ$ ), resulting in a filament with 13 nm diameter  
207 (Figure 4D). Structural docking showed that Acs1 filaments had the same arrangements as seen in the  
208 sub-tomogram average (Figure S7C), whereas the filament arrangement is different from the packing of  
209 yeast Acs1 in the previously resolved crystal structure (PDB entry: 1RY2) (Figure S7D)<sup>36</sup>.

210 In summary, we report here the first high-resolution structure of Acs1 homopolymers in a natively  
211 polymerized state. These filaments form elaborate bundles in the nucleoplasm and cytoplasm of meiotic  
212 yeast cells. Notably, nucleocytoplasmic filament bundles have previously been observed by others in

213 meiotic yeast cells<sup>37</sup> and were proposed to be actin-based/associated<sup>38</sup>. Using our novel FilamentID  
214 approach, we characterized filament structure at higher resolution, which enabled the unambiguous  
215 identification of the filament building blocks.

### 216 **Metabolites mediate Acs1 filament assembly to inhibit acetyl-CoA production**

217 Next, we set out to elucidate the functional relevance of Acs1 polymer formation. The first step towards  
218 this goal was to determine the enzymatic state of filamentous Acs1. The metabolic reaction catalyzed  
219 by Acs1 consists of two steps (Figure 5A). In the first step, Acs1 produces acetyl-AMP and diphosphate  
220 from acetate and ATP. In the second step, the acetyl-AMP intermediate reacts with CoA to generate  
221 acetyl-CoA<sup>39</sup>. During the enzymatic reaction, the large N-terminal domain (NTD) mediates the binding  
222 of ATP substrate, whereas the small C-terminal domain (CTD) undergoes a large conformational change  
223 to catalyze the second step of the reaction<sup>36,40</sup> (Figure 5B).

224 We found that Acs1 subunits in filaments have a conformation that is similar to the crystal structure of  
225 the binary complex with AMP (PDB entry: 1RY2) (R.M.S.D. 1.30 Å, Figure S8A), which represents  
226 the structure of the first step of the enzymatic reaction<sup>36</sup>. The acetyl-AMP intermediate could be  
227 observed in the active site of the NTD and is located close to the catalytic residue K675 (Figure 5B and  
228 S8B)<sup>41</sup>. Moreover, no acetyl-CoA product of the second step of the reaction was found in our  
229 reconstructed map. In order to carry out the second step of the reaction, the Acs1 CTD has to undergo a  
230 conformational change, which would result in a severe clash with the adjacent trimer layer shown by a  
231 structural superposition with the bacterial ACS representing the open conformation of the second step  
232 of the reaction (PDB entry: 1PG3; Figure 5C)<sup>40</sup>. Therefore, we propose that Acs1 in filaments catalyzed  
233 the formation of acetyl-AMP. However, once in its filamentous form, Acs1 is sterically hindered by an  
234 adjacent Acs1 trimer layer to produce the final product, acetyl-CoA.

235 To determine if the formation of acetyl-AMP is required for filament assembly, we mutated the key  
236 residue K675 in the catalytic site and monitored the presence of filament bundles in spread spheroplasts  
237 with cryoET. We did not observe any filament bundles in spreads from *acs1<sup>K675A</sup>* spheroplasts (n = 0/31),  
238 while ~80% of the control strain (*ACSI<sup>WT</sup>*) contained filament bundles (n = 24/30) (Figure 5E). Western  
239 blotting using antibodies raised against Acs1 showed comparable protein expression (Figure 5F).  
240 Moreover, we complemented this analysis by monitoring the cellular distribution of GFP-tagged Acs1.  
241 We observed fluorescent rods and foci in the *ACSI<sup>WT</sup>-GFP* strain but did not detect such structures in  
242 the *acs1<sup>K675A</sup>-GFP* mutant (Figure 5G). These data suggest that the catalytic activity of Acs1, in  
243 particular the formation of the acetyl-AMP intermediate, is required for filament bundle formation.

244 Interestingly, we detected three additional densities at the interface between Acs1 trimer layers. These  
245 extra densities likely correspond to metabolites, possibly ADP nucleotides (Figure 5D). Each putative  
246 nucleotide binds to the surface of  $\alpha$  helices in the Acs1 NTDs (Figure S8C). The putative nucleotides



247 are likely further stabilized via the  $\alpha$  helix from the consecutive Acs1 NTD, which directly contacts the  
248 positively charged residue R264 (Figure 5D). Additional interactions between two consecutive Acs1  
249 trimer layers, especially salt bridges, are likely to contribute further to filament stability (Figure S8D).  
250 To explore the role of the putative nucleotide in Acs1 filament assembly, we blocked the corresponding  
251 binding site by mutating R264 to the bulky residue tryptophan. Strikingly, we no longer detected  
252 elaborate filament bundles in spreads of meiotic *acs1*<sup>R264W</sup> spheroplasts (n = 0/30), even though the  
253 expression level of Acs1<sup>R264W</sup> was comparable to Acs1<sup>WT</sup> (Figure 5E-F). Additionally, most meiotic cells  
254 of *acs1*<sup>R264W</sup>-GFP mutants contained only diffuse fluorescent signal (Figure 5G).

255 Overall, our structural and mutant analyses indicate that Acs1 polymerization is mediated by two  
256 metabolites, acetyl-AMP bound in the catalytic pocket and a putative nucleotide bound at the filament  
257 layer interface.

### 258 **The catalytic activity of Acs1 is required for sporulation and germination, whereas filament** 259 **formation is required for germination after prolonged dormancy**

260 Since *S. cerevisiae* harbors two acetyl-CoA synthetase isoforms, we wanted to understand under which  
261 specific conditions Acs1 and its polymerization become critical. In an accompanying study, we  
262 monitored global protein dynamics throughout meiosis using quantitative mass spectrometry and  
263 observed that Acs1 expression is strongly upregulated at the onset of meiosis, when compared to  
264 mitotically dividing cells (Figure 6A)<sup>31</sup>. Acs2, on the other hand, is highly expressed in mitotically  
265 dividing cells, but downregulated during meiosis. Western blotting confirmed that the Acs1 level  
266 increased in response to pre-meiotic starvation and increased even further approximately four hours after  
267 induction of meiosis (Figure 6B).

268 In order to follow the formation of large Acs1 assemblies throughout the meiotic cell division program,  
269 we monitored Acs1-GFP by fluorescent light microscopy. Meiotic cells, as well as spores, exhibited  
270 fluorescent Acs1-GFP foci or rod-shaped signals (Figure 6C, S9). The number and intensity of Acs1-  
271 GFP foci and rods appeared to increase throughout the meiotic program. Correlated light and electron  
272 microscopy showed that Acs1-GFP foci indeed colocalized with polymerized Acs1-GFP, even though  
273 filament length and filament bundling pattern seemed to be affected by the tag (Figure S10A-C).

274 Based on the presence of Acs1-GFP foci in meiotic cells as well as in spores, we then probed the role of  
275 Acs1 in gametogenesis. We quantified sporulation efficiency in wild-type and different *acs1* mutant  
276 strains upon gradual starvation (proliferating cells were starved in YPA before switching to SPM) or  
277 acute starvation (proliferating cells were transferred from YPD directly into SPM). No significant  
278 differences between the strains tested were observed upon gradual starvation (Figure 6D and S11). In  
279 contrast, upon acute starvation, *acs1Δ* cells failed to sporulate (Figure 6E). This was also the case for

280 the catalytic point mutant *acsI*<sup>K675A</sup>. Interestingly, the filament interface mutant *acsI*<sup>R264W</sup> sporulated  
281 with comparable efficiency to the wild-type control *ACSI*<sup>WT</sup>.

282 The experiments above indicate that the catalytic activity of Acs1 is required for efficient gametogenesis,  
283 while filament formation is dispensable. However, they do not exclude that filament formation might be  
284 required for spore viability, especially after prolonged periods of dormancy. We therefore used live cell  
285 imaging to monitor spore germination and return to growth of spores of different ages. Gradual  
286 starvation was used to induce sporulation and spores were kept in sporulation medium up to eight weeks  
287 before inducing germination by switching to medium containing 2% glucose (Figure 6F). One day after  
288 spore formation, most spores from all genotypes germinated within the 9 h of live cell imaging (Figure  
289 6G). However, we noticed a delay in cell cycle re-entry for the *acsI*<sup>K675A</sup> and *acsI*Δ mutants, when  
290 compared to the *ACSI*<sup>WT</sup> control. Interestingly, the *acsI*<sup>R264W</sup> spores germinated slightly faster than  
291 *ACSI*<sup>WT</sup>, indicating that filament formation might delay the germination of newly generated spores.  
292 When spores were kept in sporulation medium for longer periods of time, we noticed a strong reduction  
293 in the number of spores from *acsI*<sup>K675A</sup> and *acsI*Δ mutants strains that were able to germinate (Figure  
294 6G). Remarkably, the filament interface mutant strain (*acsI*<sup>R264W</sup>) also showed a steeper increase of time  
295 required for re-entry into mitotic proliferation, when compared to the *ACSI*<sup>WT</sup> control. Moreover, after  
296 prolonged times of dormancy, a large proportion of *acsI*<sup>R264W</sup> spores completely failed to germinate,  
297 whereas the vast majority of *ACSI*<sup>WT</sup> spores re-entered proliferation efficiently (Figure 6G).

298 These data suggest that the polymerization of Acs1 into filaments is not required for the formation of  
299 spores upon starvation. Moreover, filament formation, which inhibits catalytic function, may delay cell  
300 cycle re-entry after short periods of starvation. However, failure to form Acs1 filaments results in  
301 impaired return to growth after prolonged periods or dormancy. As such, it is likely that the inheritance  
302 of meiotically-assembled Acs1 filaments plays a fundamental role in preparing spores for –  
303 unpredictably – extended periods of dormancy.

#### 304 **Acs1 polymerization is a general response to starvation and required for efficient recovery**

305 While monitoring the subcellular localization of Acs1-GFP, we noted that starved pre-meiotic cells  
306 already contained Acs1-GFP foci (Figure 6C), suggesting that filament formation may occur as part of  
307 a general response to the metabolic state, rather than being a meiosis-specific event. This would be  
308 consistent with previous work showing that various GFP-tagged metabolic enzymes, including Acs1,  
309 formed fluorescent foci upon nutrient depletion<sup>10,12</sup>. To test this hypothesis, we cultured haploid cells,  
310 which cannot undergo meiosis, for 24 hours in YPA medium (containing acetate, a non-fermentable  
311 carbon source, instead of glucose). CryoET imaging of spread spheroplasts revealed prominent Acs1  
312 filament bundles as well as single Ald4 filaments that resembled those observed during meiosis (Figure  
313 7A).



314 Having established that Acs1 filament formation also occurs when vegetative cells are starved in  
315 medium containing acetate, we tested whether Acs1 played a role in return to growth after starvation,  
316 independently from the meiotic cell division program. We cultured haploid cells for different periods of  
317 time in medium with glucose (YPD medium) or in medium with acetate (YPA medium). The cells were  
318 then transferred onto YPD and return to growth was monitored. As expected, after YPD starvation, wild-  
319 type and Acs1 mutants recovered with similar efficiencies (Figure 7B), likely due to the functional  
320 compensation by Acs2, which is upregulated in such conditions<sup>42</sup>. In contrast, after five days of YPA  
321 starvation, significant defects in recovery were observed for the Acs1 catalytically deficient mutant  
322 (*acs1<sup>K675A</sup>*) as well as for the subunit interface mutant (*acs1<sup>R264W</sup>*). Altogether, these data support a model  
323 in which Acs1 filament formation is generally required for the ability of cells to return to proliferation  
324 after prolonged periods of starvation.

325

## 326 **DISCUSSION**

327 Our multimodal cryoEM imaging approach on spread samples, termed FilamentID, revealed the  
328 structural organization of two novel types of filament assemblies composed of Ald4 and Acs1. Both  
329 metabolic enzymes are conserved across all domains of life. Acs homologs play a critical role in carbon  
330 metabolism and are also involved in the regulation of histone acetylation, which directly impacts  
331 chromatin structure and gene expression<sup>43,44</sup>. Ald homologs metabolize reactive aldehydes, and, as such,  
332 have important roles in detoxification and cell homeostasis<sup>45</sup>. Reflecting the functions in these central  
333 cellular processes, human Acs and Ald homologs are associated with disease. ACSS2 is highly  
334 expressed in cancer cells under conditions of metabolic stress<sup>46</sup>, whereas reduced function of the  
335 mitochondrial ALDH2 has been linked to cancer predisposition, cardiovascular disease and, in 8% of  
336 the world population, alcohol intolerance<sup>47</sup>. From this perspective, it will be exciting to investigate  
337 whether polymer formation is an evolutionarily conserved aspect of Ald and Acs function, and whether  
338 polymerization may become altered in the context of disease. In the following paragraphs, we discuss  
339 the impact of our study on the understanding of Acs1 biology and metabolic enzyme filaments in  
340 general, as well as the methodological advances.

### 341 **Context-specific enzyme polymerization: Acs1 subunit interfaces may sense the metabolic state of** 342 **cells**

343 Acetyl-CoA synthases and aldehyde dehydrogenases are protein families whose individual isoforms can  
344 be differentially regulated in terms of abundance and subcellular localization. Yeast Acs1 and Ald4  
345 share a tight transcriptional repression by glucose<sup>48,49</sup>. Consistent with this notion, both proteins  
346 accumulate in starved pre-meiotic G0/G1 cells and throughout meiosis (Figure 6A)<sup>31</sup>. Furthermore,  
347 among several other metabolic enzymes, Acs1 and Ald4 were previously shown to accumulate as  
348 distinct foci in starved yeast cells, when tagged with GFP<sup>10</sup>. The mechanistic underpinnings of this  
349 behavior are currently unknown for most such enzymes. It has been proposed that low nutrient levels  
350 lead to cytoplasmic acidification and reduction in cell volume, eventually triggering widespread protein  
351 clustering, which leads to the transition of the cytoplasm from a fluid into a solid-like state<sup>16,50,51</sup>. Acs1  
352 and Ald4 may therefore constitute isoforms of their respective enzyme families that have evolved the  
353 ability to polymerize in response to nutrient scarcity.

354 An elegant example of how a metabolic state can be sensed to trigger filament formation has been  
355 proposed for yeast CTP synthase. CTP synthase contains a histidine residue at the subunit interface that  
356 becomes protonated at low pH, leading to an increased affinity for the neighboring subunits<sup>15</sup>.  
357 Consistent with the idea that subunit interfaces can sense nutrient levels, our high-resolution structure  
358 of natively assembled Acs1 filaments revealed a metabolite, possibly ADP, at the interface of  
359 consecutive protomers (Figure 5D). Mutating the binding site at the interface abolished filament bundle

360 formation (Figure 5E, 5G). It is therefore tempting to speculate that sensing of the metabolic state of the  
361 cell via ADP levels, which transiently increase during meiosis<sup>52</sup>, may constitute a trigger for Acs1 to  
362 polymerize. This underlines the critical role of subunit interfaces in the response to changes in nutrient  
363 availability to tune oligomerization states. Besides this proposed mechanism, it is likely that other  
364 regulatory layers play a role, including increased Acs1 expression levels and phosphorylation during  
365 meiosis<sup>31</sup>. These aspects should be considered in future approaches aimed at reconstituting Acs1  
366 filament formation *in vitro*.

### 367 **Acs1 polymerization is required for the recovery of chronologically aged dormant cells**

368 We propose a model, in which the essential catalytic function of Acs1, Acetyl-CoA synthesis, is carried  
369 out at the onset of meiosis, when ATP production to support the vast biosynthetic needs of sporulation  
370 is high<sup>53</sup>, being shortly after followed by enzyme self-inhibition (Figure 7C). The upregulation of Acs1  
371 under nutrient limiting conditions is accompanied by the polymerization of trimers into filaments, which  
372 inactivates the enzyme. Should the inhibition of Acs1 be important for meiosis itself, one would expect  
373 that sporulation or spore viability becomes compromised in mutants that specifically fail to form  
374 filaments. We found that such a mutant (*acs1<sup>R264W</sup>*) showed normal levels of sporulation (Figure 6E).  
375 Remarkably, however, *acs1<sup>R264W</sup>* failed to re-enter the cell cycle after prolonged periods of starvation-  
376 induced dormancy (Figure 6G). Therefore, polymer formation appears to sustain the viability of dormant  
377 spores that become chronologically old(er). More generally, Acs1 filaments also form in starved haploid  
378 cells that cannot undergo meiosis and the ability of Acs1 to polymerize is critical for return to growth  
379 after prolonged periods of starvation (Figure 7B).

380 How does Acs1 polymerization prime dormant/starved cells for efficient return to proliferation? We  
381 envision several possible mechanisms: 1) The inactivation of Acs1 in polymers plays a role in lowering  
382 acetyl-CoA levels as cells prepare to enter dormancy. This could, for example, ensure that histone  
383 acetylation, which is a driver of chromatin openness and gene expression<sup>54</sup>, remains low. 2) On the  
384 other hand, Acs1 depolymerization after prolonged periods of starvation/dormancy, allows for the swift  
385 generation of acetyl-CoA by the stored enzyme upon encountering favorable conditions. This provides  
386 a two-fold advantage, namely no need for de novo Acs1/Acs2 synthesis, and, since Acs1 filaments are  
387 acetyl-AMP-bound, acetyl-CoA can be produced without expending additional cellular ATP. 3) The  
388 catalytic inactivation of Acs1, an abundant ATP-consuming enzyme, could help to preserve ATP levels  
389 that are needed for minimal metabolism and for the re-entry into a metabolically active state. 4) Storage  
390 of Acs1 via the formation of filament bundles could protect from autophagic degradation, which is a  
391 highly active process during meiosis<sup>55</sup>. 5) Acs1 polymerization is part of a general cellular response to  
392 solidify the cytoplasm. Such a transition was shown to increase mechanical stability and has been  
393 proposed to protect from environmental stress<sup>50,51</sup>.

394 An important remaining question is the molecular basis and relevance of Acs1 (and Ald4) to form  
395 filaments that are organized in higher-order bundles and arrays (Figure 1A-C). These mesoscale  
396 assemblies are likely established through lateral contacts of individual filaments. This idea is supported  
397 by the observation that C-terminally GFP-tagged Acs1 formed only short filaments that co-localize in  
398 unordered aggregates (Figure S10). The GFP-tag emanating from the filament surface likely disrupts  
399 bundle formation and long-range polymerization. These findings underline the importance of integrating  
400 cryoET imaging of untagged wild-type cells for a comprehensive understanding of metabolic enzyme  
401 filaments across scales. Overall, our study will serve as a framework to understand how the  
402 polymerization of metabolic enzymes and the formation of higher-order bundles may prime cells for  
403 efficient recovery from dormancy.

#### 404 **The FilamentID workflow can be adapted to various types of filaments**

405 Besides the possibility of analyzing the *in situ* structure of identified filament assemblies, cryoET is a  
406 powerful method to discover new cellular ultrastructures in a range of cellular states, organisms, and  
407 tissues<sup>21,22</sup>. The *de novo* identification of such structures *in cellulo*, however, is extremely challenging,  
408 as it requires the determination of reconstructions by sub-tomogram averaging at a resolution of typically  
409  $<4 \text{ \AA}$  to unambiguously identify unique amino acid sequences. Recent successful examples were enabled  
410 by the combination of 1) highly abundant target complexes (e.g. ribosomes) and 2) particularly thin  
411 samples for imaging, for instance skinny bacteria<sup>56,57</sup> or cryoFIB-thinned cells<sup>58,59</sup>. An alternative  
412 approach to sub-tomogram averaging is to determine high-resolution structures via single-particle  
413 cryoEM, however, this is typically done on purified complexes. Integrated with advanced computational  
414 analyses, *de novo* identification is also feasible with rather heterogeneous samples<sup>60-62</sup>. Any purification,  
415 however, can lead to disassembly of the structure of interest.

416 The FilamentID workflow (Figure 2) combines complementary imaging modalities on gently lysed  
417 cells/organelles and has three major advantages over the above conventional approaches: 1) FilamentID  
418 needs no prior sample knowledge; 2) FilamentID can be applied to targets of rather low abundance and  
419 heterogeneity at the superstructural level; and 3) FilamentID sample preparation does not require time-  
420 consuming cryoFIB milling or purification optimizations. Limitations of the technique are that 1) the  
421 targeted single-particle cryoEM data collection needs to be guided to areas of interest (target complexes  
422 need to be visible at low magnification); and 2) membrane integrity and cellular context is lost due to  
423 the spreading.

424 In the present study, FilamentID could unambiguously pinpoint the composition of two different types  
425 of filamentous assemblies. We note, however, that we detected other types of filaments in cryo-  
426 tomograms of spread yeast cells (Figure S5B). In the future, the workflow could be adapted to study  
427 various culturing conditions, distinct developmental programs, different cell types, and diverse  
428 organisms.

## 429 **ACKNOWLEDGMENTS**

430 We thank the imaging facility ScopeM at ETH Zürich and BioOptics facility at University of Vienna  
431 for instrument access and support. The Matos Lab was supported by ETH (31 17-2), SNSF (176108),  
432 FWF (SFB Meiosis - 8807-B) and ERC (101002629) grants. The Pilhofer Lab was supported by the  
433 NOMIS Foundation.

## 434 **AUTHOR CONTRIBUTIONS**

435 J.H. performed the sample preparations for cryoEM/cryoET with the help of F.W.; J.H. and J.X.  
436 performed cryoET data collection and analysis; J.H. and J.X. collected cryoEM data; J.X. reconstructed  
437 the cryoEM maps and determined the structures; R.W. provided MS data and analysis; J.H., R.W., L.I.  
438 D.V. and A.H. generated yeast strains. R.W. and A.H. performed western blotting experiments; J.H. and  
439 R.W. performed sporulation efficiency assays; L.I. performed immuno-florescence imaging. J.H.  
440 performed correlative cryoLM and cryoET imaging; J.H. did starvation recovery assays; D.V. performed  
441 germination assays and analyzed the data with J.H.; J.M. and M.P. conceived and supervised the project;  
442 J.H., J.X., J.M. and M.P. wrote the manuscript with input from all authors.

## 443 **DECLARATION OF INTERESTS**

444 The authors declare no competing interests.

## 445 **DATA AND MATERIAL AVAILABILITY**

446 The EMDB entries for the cryo-EM density maps of the Acs1 and Ald4 filaments reported in this paper  
447 are EMD-XXXXX (Ald4) and EMD-XXXXX (Acs1). The PDB entries for the corresponding atomic  
448 models reported in this paper are XXXX (Ald4) and XXXX (Acs1).

449 The EMDB entries for the tomograms showing Ald4 or Acs1 filament bundles are EMD-XXXXX (Ald4  
450 filaments in mitochondria; meiotic *in cellulo*), EMD-XXXXX (Acs1 filaments in the nucleus; meiotic *in*  
451 *cellulo*), EMD-XXXXX (Acs1 filaments in the cytoplasm; meiotic *in cellulo*), EMD-XXXXX (Ald4  
452 filaments in purified mitochondria from meiotic cells), (Acs1 filaments in spread spheroplasts from  
453 meiotic cells), and EMD-XXXXX (Acs1 and Ald4 filaments in spread spheroplasts from starved cells).

454

455

456 **FIGURES**

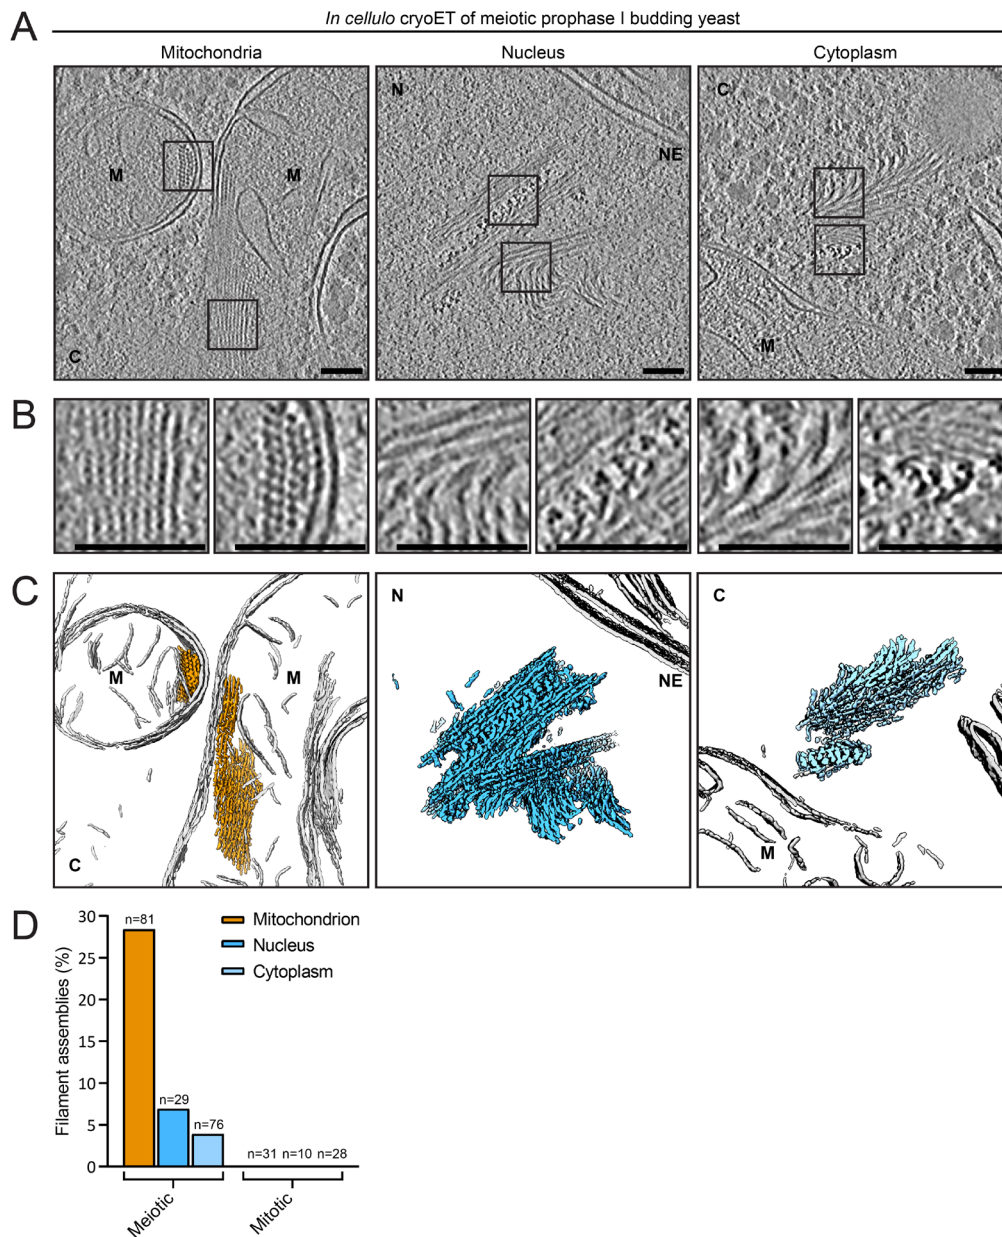

457

458 **Figure 1. Filament assemblies form in the mitochondria, nucleus, and cytoplasm of meiotic yeast**  
 459 **cells.** See also Figure S1.

460 (A) Slices through cryo-tomograms of FIB-milled meiotic prophase I budding yeast cells with filament  
 461 assemblies in the mitochondria, in the nucleus, and in the cytoplasm. Shown are projections of 9.14 nm  
 462 (mitochondria) and 8.68 nm (nucleus and cytoplasm) thick slices. Cells were collected from a *ndt80Δ*  
 463 strain arrested in prophase I, 8 h post induction of meiosis. M: mitochondrion, C: cytoplasm N: nucleus,  
 464 NE: nuclear envelope. Scale bars: 100 nm.



465 **(B)** Magnified views of cryo-tomograms shown in **(A)**. Note that the top views of single filaments  
466 display a round shape for mitochondrial filaments, whereas the nuclear and cytoplasmic filaments have  
467 a triangular shape. Scale bars: 100 nm.

468 **(C)** Segmentation models of cryo-tomograms in **(A)** showing filament arrays and bundles.  
469 Mitochondrial filaments (orange), nuclear filaments (blue), and cytoplasmic filaments (light blue) are  
470 highlighted. Organelle membranes are colored in gray.

471 **(D)** Filament assemblies in the different cellular compartments are observed in meiotic but not in  
472 mitotically dividing cells. Meiotic mitochondria (n = 81), nuclei (n = 29), and cytoplasm (n = 76) and  
473 mitotic mitochondria (n = 31), nuclei (n = 10), and cytoplasm (n = 28) were analyzed. The fraction (%)  
474 of mitochondria, nuclei, and cytoplasm containing the main types of filaments described in **(A-C)** is  
475 indicated for each cellular context. Numbers for analyzed compartments (n) represent cumulated results  
476 from at least two independent experiments.

477

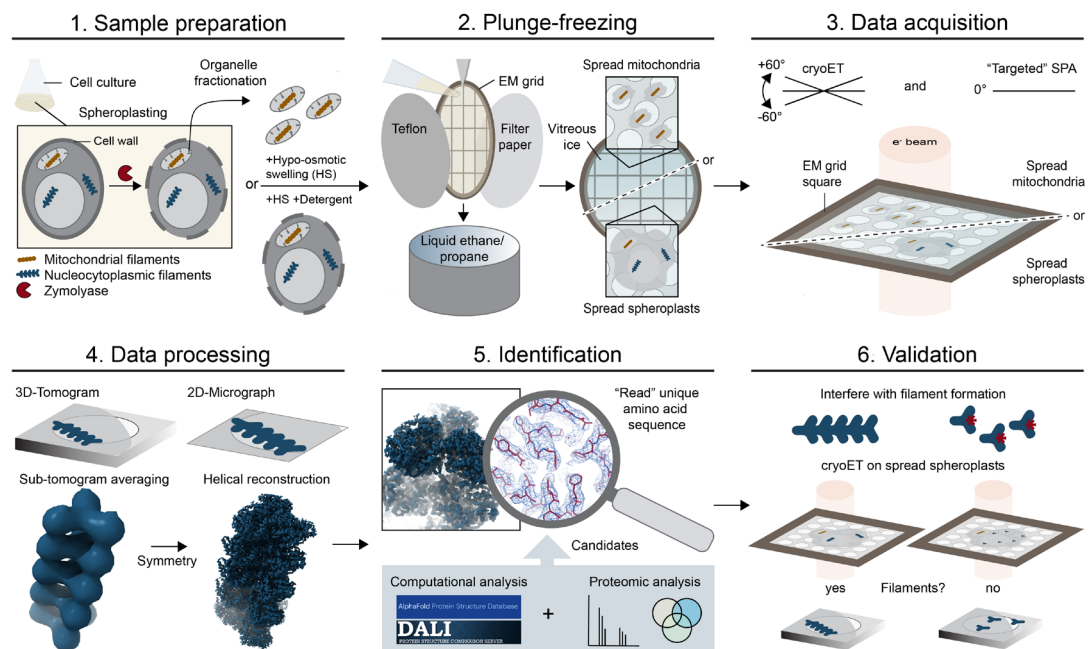

478

479 **Figure 2. FilamentID: a workflow to identify cellular filaments of unknown molecular**  
 480 **composition.** See also Figure S2/S5.

481 Schematic workflow to identify the composition of Filament assemblies (FilamentID) observed *in*  
 482 *cellulo*. Key steps (1-6): (1) Sample preparation: cells are spheroplasted by digesting the cell wall with  
 483 Zymolyase. Depending on the subcellular localization of the filaments, either mitochondria are purified  
 484 and spread onto EM grids, or entire cell spheroplasts are spread onto EM grids by hypo-osmotic swelling  
 485 and the addition of detergent. (2) Plunge-freezing: samples are vitrified by plunge-freezing. (3) Each  
 486 sample is imaged by recording tilt series for cryoET, as well as 2D projection images for single-particle  
 487 cryoEM. (4) Data processing: the cryoET data are used to generate sub-tomogram averages to determine  
 488 filament symmetry. Subsequently, single-particle data are used to generate high-resolution maps by  
 489 helical reconstruction, based on the initial symmetry information determined by cryoET. (5)  
 490 Identification: information from computational analysis is used to identify the filament component(s).  
 491 Depending on the level of resolution obtained, complementary information from proteomics can be used  
 492 to narrow down candidates. (6) Validation: candidate gene(s) are deleted and cryoET is used to verify  
 493 the impact on filament structure. In addition, the structural information obtained is used to guide the  
 494 perturbation of filament formation by the introduction of specific point mutations. Note: it also would  
 495 have been possible to identify the mitochondrial filaments without the mitochondrial purification in step  
 496 1; however, the mitochondrial purification step significantly simplifies steps 3-6. For simplicity, in steps  
 497 4-6 only the nucleocytoplasmic filament is shown.

498



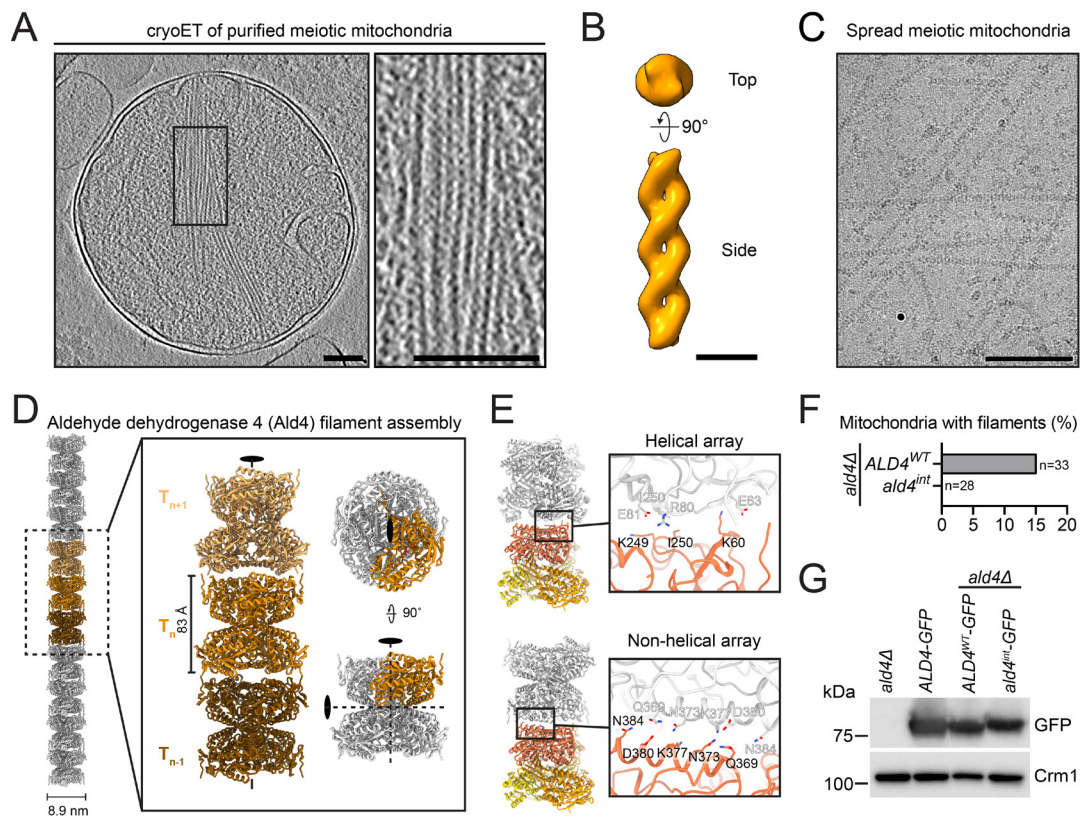

499

500 **Figure 3. The conserved mitochondrial aldehyde dehydrogenase Ald4 polymerizes into filaments.**

501 See also Figure S2-S4.

502 (A) Slice through a cryo-tomogram of purified mitochondria. Note that straight filament arrays can cross  
 503 the entire width of the mitochondrion as depicted. Magnified view of the boxed area is shown on the  
 504 right. Cells were collected from a *ndt80*Δ strain arrested in prophase I, 6 h post induction of meiosis.  
 505 Shown are projections of 5.5 nm thick slices. Scale bars: 100 nm.

506 (B) Sub-tomogram averaging of filaments from purified meiotic mitochondria shown in (A) reveals a  
 507 two-fold symmetry. Shown are top and side views. Scale bar: 10 nm.

508 (C) Purified mitochondria in (A) were spread and imaged by cryoEM. A representative micrograph with  
 509 individual filaments observed in spread meiotic mitochondria is shown. Scale bar: 100 nm.

510 (D) Structural model of Ald4 in a filamentous form. Left: stacked array of one Ald4 filament, in which  
 511 three consecutive Ald4 tetramers are colored in different shades of orange. Right: magnified view of the  
 512 central three Ald4 tetramers on the left. The top and side views of the ribbon diagram of the central Ald4  
 513 tetramer are shown on the right, where a single Ald4 subunit is colored orange. The two-fold axis of  
 514 Ald4 is represented by an ellipse.

515 (E) Ribbon diagrams showing the putative interfaces between two consecutive Ald4 tetramers in helical  
 516 (top) and non-helical (bottom) arrays. The subunits of one Ald4 tetramer are colored in different shades

517 of orange, while the other Ald4 tetramer is colored white. The detailed interface contacts are shown on  
518 the right, where the side chains of putative residues mediating contacts are labeled and shown in stick  
519 diagrams.

520 (F) The Ald4 interface shown in (E) is needed for filament formation. Purified mitochondria from  
521 meiotic cultures (6 h after induction of meiosis) of the indicated genotypes were analyzed by cryoET as  
522 described in more detail in Figure S4E. Shown are percentages of mitochondria containing filaments  
523 and the total number of mitochondria (n) analyzed for each genotype are indicated.

524 (G) Ald4 interface mutations do not affect protein stability. Western blot analysis from haploid cell  
525 cultures collected after 24 h in YPA media. Ald4-GFP expression levels were probed with anti-GFP  
526 antibodies and compared in strains with the indicated genotypes. Crm1 was used as protein  
527 normalization control.

528

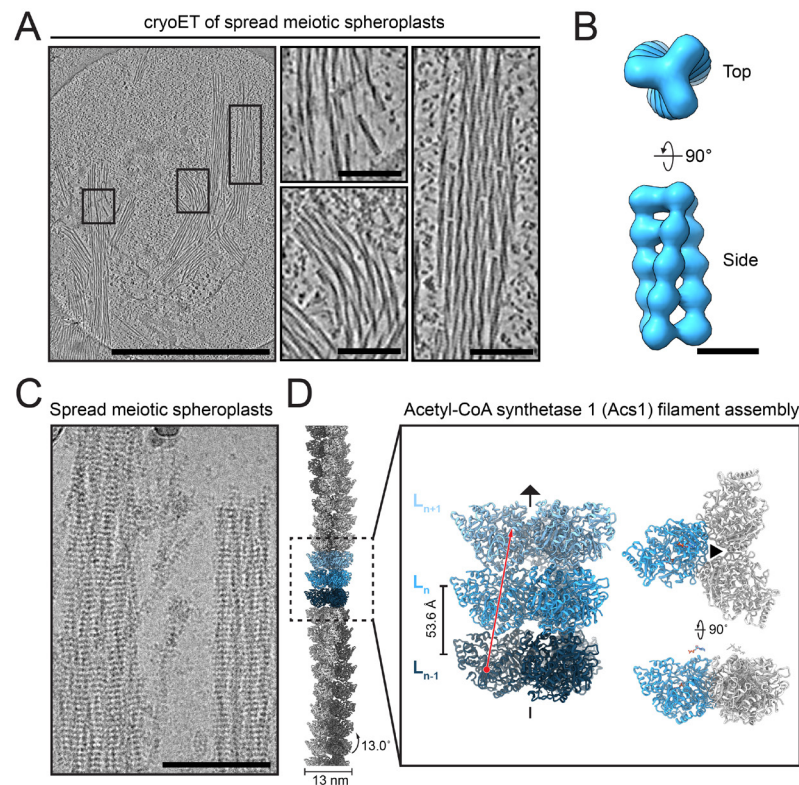

529

530 **Figure 4. The conserved acetyl-CoA synthetase Acs1 forms filament assemblies in the nucleus and**  
531 **the cytoplasm. See also Figure S5-S7.**

532 (A) Slice through a cryo-tomogram of spread meiotic yeast spheroplasts enable a detailed view of the  
533 nucleocytoplasmic filaments assemblies observed in Figure 1A. Magnified views of the boxed areas  
534 highlight single filaments as well as straight and bent bundles. Cells were collected from a *ndt80Δ* strain  
535 arrested in prophase I, 8 h post induction of meiosis. Shown are projections of 9.14 nm thick slices.  
536 Scale bars: 1  $\mu\text{m}$  and 100 nm for magnified views.

537 (B) Sub-tomogram averaging of filaments from yeast spheroplasts shown in (A) reveals a three-fold  
538 symmetry with a ladder-like repeat. Shown are top and side views. Scale bar: 10 nm.

539 (C) Representative cryoEM micrograph of filament bundles from spread meiotic yeast spheroplasts as  
540 shown in (A). Scale bar: 100 nm.

541 (D) Structural model of Acs1 in its filamentous form. Left: Helical array of triple-helical Acs1 filament.  
542 A single helical strand is highlighted in dark gray and three consecutive layers are colored in different  
543 shades of blue. Right: Magnified view of the central three layers on the left. The single helical strand is  
544 marked with a red arrowhead. The side and top view of the ribbon diagram of the central Acs1 trimer  
545 are shown on the right, where a single Acs1 subunit is colored in blue. The three-fold axis of the Acs1  
546 trimer is represented by a triangle.

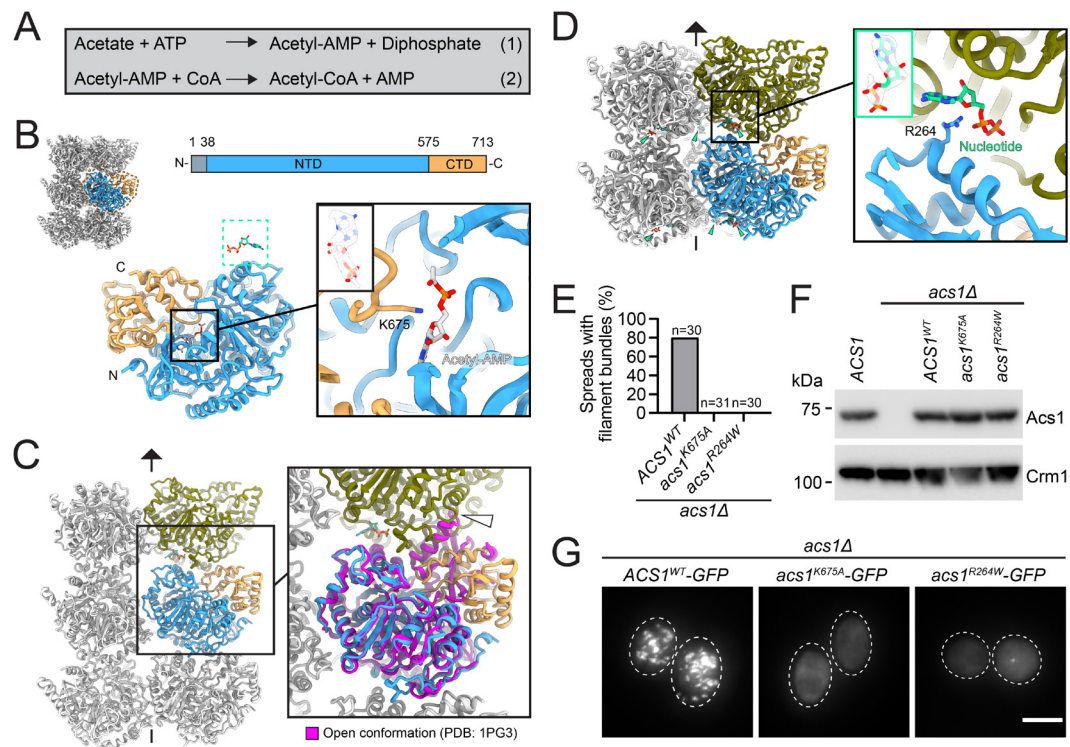

547

548 **Figure 5. Metabolites mediate Acs1 filament assembly to inhibit acetyl-CoA production.** See also  
 549 Figure S8.

550 (A) Acs1 uses acetate and ATP to produce acetyl-CoA in a two-step reaction. In the first step, an acetyl-  
 551 AMP intermediate is formed, and diphosphate is released. In a second step, acetyl-AMP reacts with CoA  
 552 to produce acetyl-CoA with the release of AMP<sup>39</sup>.

553 (B) Ribbon and stick diagrams showing two types of metabolites bound to Acs1 in the filament. Top  
 554 left: the helical array of three Acs1 layers, where one subunit is colored and highlighted with a dashed  
 555 line. Top right: Scheme showing the overall Acs1 domain organization, where the N-terminal large  
 556 domain (NTD) and the C-terminal small domain (CTD) are colored blue and orange respectively. The  
 557 flexible N-terminal part, which is not resolved in the structure, is colored grey. Bottom-left: the structural  
 558 model of one Acs1 subunit with two metabolites bound (acetyl-AMP: gray; nucleotide (potentially  
 559 ADP): green). The position of the nucleotide is highlighted with a green dashed box and the details are  
 560 shown in panel (D). Bottom-right: Magnified view showing the contacts between acetyl-AMP and Acs1.  
 561 The side chain of the residue in the catalytic center (K675) is shown in stick diagram, while the  
 562 corresponding densities around acetyl-AMP are transparent.

563 (C) Ribbon diagrams illustrating the predicted structural clashes that prevent the second step in acetyl-  
 564 CoA synthesis when Acs1 is in a filamentous form. Left: helical assembly of three Acs1 trimer layers,  
 565 where one Acs1 subunit is color-coded as in (B) and one subunit from the adjacent trimer layer is colored  
 566 olive. Right: structural superposition of one Acs1 subunit with CoA-bound bacterial ACS (PDB entry:



567 1PG3)<sup>40</sup>. Note the severe steric clashes (highlighted with white arrowhead) between the bacterial  
568 homolog (magenta) and the Acs1 molecules in the adjacent filament layer (olive).

569 **(D)** Ribbon and stick diagrams showing the metabolic nucleotide (potentially ADP) bridging two Acs1  
570 adjacent layers. Left: the structure of Acs1 subunits from two adjacent layers. The color code of two  
571 subunits matches panel **(C)**. Right: Magnified view showing the contacts between the nucleotide (green)  
572 and Acs1 subunits. The side chain of the residue binding to the nucleotide (R264) is shown in stick  
573 diagrams. The corresponding densities around the nucleotide are shown in transparent.

574 **(E)** No filament bundles are detected in point mutation strains of the residues shown in **(B)** and **(D)**.  
575 Spread meiotic yeast spheroplasts (6 h after induction of meiosis) for the indicated genotypes were  
576 analyzed by cryoEM as described in more detail in Figure S7D. Shown are percentages of spreads  
577 containing Acs1 filament bundles in EM images and the total number of spreads (n) analyzed for each  
578 genotype are indicated.

579 **(F)** Acs1 point mutations do not affect protein stability. Western blot analysis from meiotic cell cultures  
580 collected 6 h after induction of meiosis. Acs1 expression levels were probed with an anti-Acs1 antibody  
581 and compared in strains with the indicated genotypes. Crm1 was used as protein normalization control.

582 **(G)** Fluorescent rods and foci formation is disrupted in *ACS1* point mutation strains C-terminally tagged  
583 with GFP. Shown are representative maximum intensity projections of the Acs1-GFP signal expressed  
584 from the endogenous promotor for the indicated genotypes. Cells were collected 6 h after induction of  
585 meiosis. Cell walls are indicated with a dashed white line. Scale bar: 5  $\mu\text{m}$ .

586

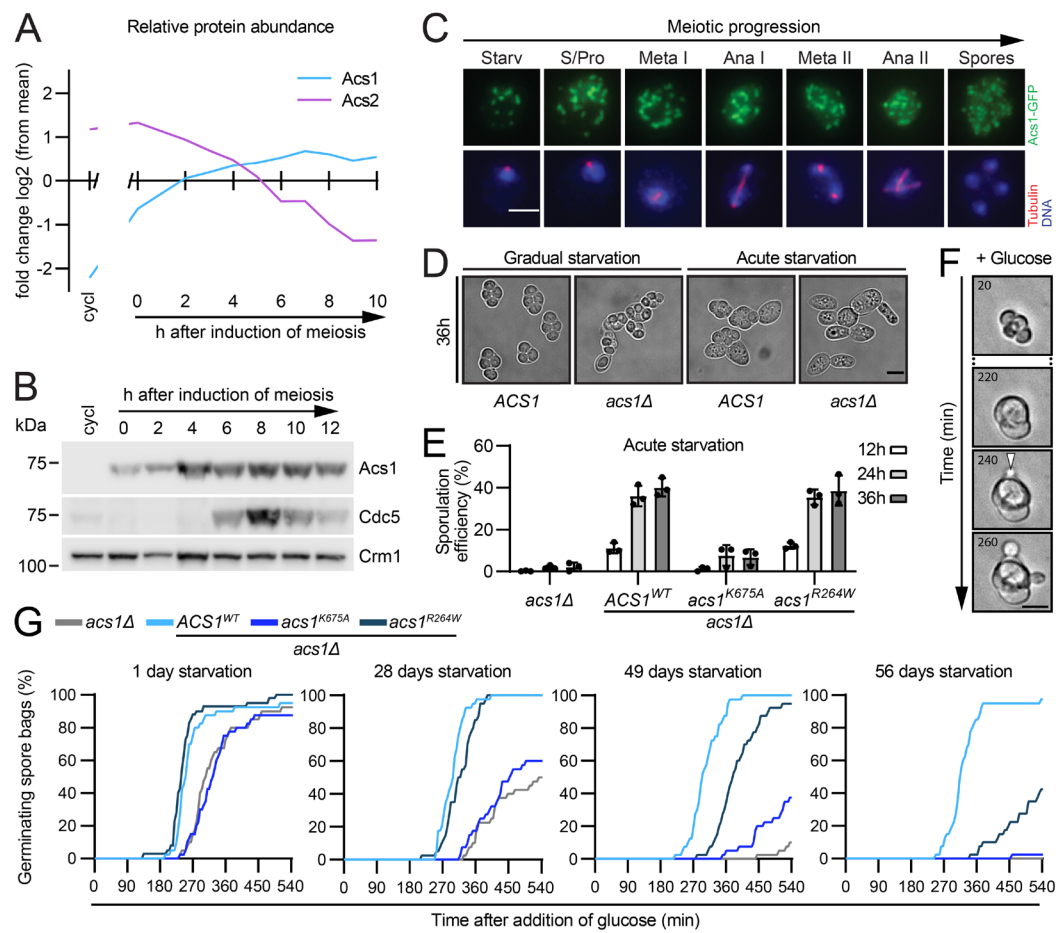

587

588 **Figure 6. The catalytic activity of Acs1 is required for sporulation and germination, whereas**  
 589 **filament formation is required for germination after prolonged dormancy.** See also Figure S9-S11.

590 **(A)** Dynamic changes in the relative expression of Acs1 and Acs2 monitored by quantitative proteomics,  
 591 extracted from <sup>31</sup>. Samples from cycling mitotic cultures (cycl; in YPD medium), and samples collected  
 592 at the indicated time points after induction of meiosis from G0/G1 have been analyzed. The plotted  
 593 values represent the log<sub>2</sub> fold change in each sample compared to the average peptide/protein expression  
 594 from all samples.

595 **(B)** Acs1 is highly expressed throughout meiosis. Western blot analysis of Acs1 in exponentially  
 596 growing cycling cultures (cycl; in YPD medium), and at the indicated time points after induction of  
 597 meiosis, in SPM medium. Cdc5 expression was used as a marker of meiotic progression whereas Crm1  
 598 serves as protein normalization control.

599 **(C)** Acs1-GFP forms foci and rods throughout gametogenesis. Acs1-GFP expressed from the  
 600 endogenous promoter was analyzed by immunofluorescence using anti-GFP antibodies. Spindle  
 601 morphology and DNA were visualized using anti- $\alpha$ -tubulin antibodies and DAPI respectively. The  
 602 experiment shown is representative for two independent experiments. Scale bar: 3  $\mu$ m.

603 **(D)** *Acs1* is needed for efficient sporulation after acute starvation. Yeast strains with the indicated  
604 genotypes were induced to enter meiosis by transfer from YPD to SPM (acute starvation), or by transfer  
605 from YPD to YPA to SPM (gradual starvation). Shown are representative images of the sporulation  
606 efficiency 36 h after transfer to SPM medium. Note that in acutely starved cell cultures of an *acs1Δ*  
607 strain no ascospore formation was observed. Quantification of the sporulation efficiency is shown in  
608 Figure S11. Scale bar: 5  $\mu$ m.

609 **(E)** The catalytic activity of *Acs1* is needed for efficient sporulation, whereas filament formation is  
610 dispensable. Yeast strains with the indicated genotypes were induced to sporulate as in **(D)** under acute  
611 starvation conditions. The efficiency of ascospore formation was quantified by assessing the  
612 morphology of 200 cells from three independent experiments after 12, 24, and 36 h in SPM. Ascospore  
613 formation was considered successful if at least two spores were enclosed by a spore wall. Plotted values  
614 show the mean  $\pm$  SD.

615 **(F)** Live cell imaging of ascospore germination. Strains shown in **(G)** were induced to sporulate under  
616 gradual starvation conditions, as described in **(D)**. Mature spores were then induced to germinate by  
617 exchanging the sporulation medium (SPM) to glucose-rich medium (SC + 2% Glucose). Light  
618 microscopy DIC images were collected every 5 min to follow the initial bud formation, which was  
619 considered as the initial point of re-entry into the cell cycle. Example images depict the key  
620 morphological changes that occur after transfer of the spores to glucose-rich medium, with bud  
621 formation marked by the white arrowhead. Scale bar: 5  $\mu$ m.

622 **(G)** *Acs1* filament formation is needed after prolonged dormancy. Ascospore germination was analyzed  
623 as described in **(F)** for strains with the indicated genotypes, after cells were cultured for 1, 28, 49, and  
624 56 days in SPM medium. 40 ascospores per genotype and condition were imaged for cell cycle re-entry.  
625 Live cell imaging was performed for a total duration of 540 min (9 h) after glucose addition.

626

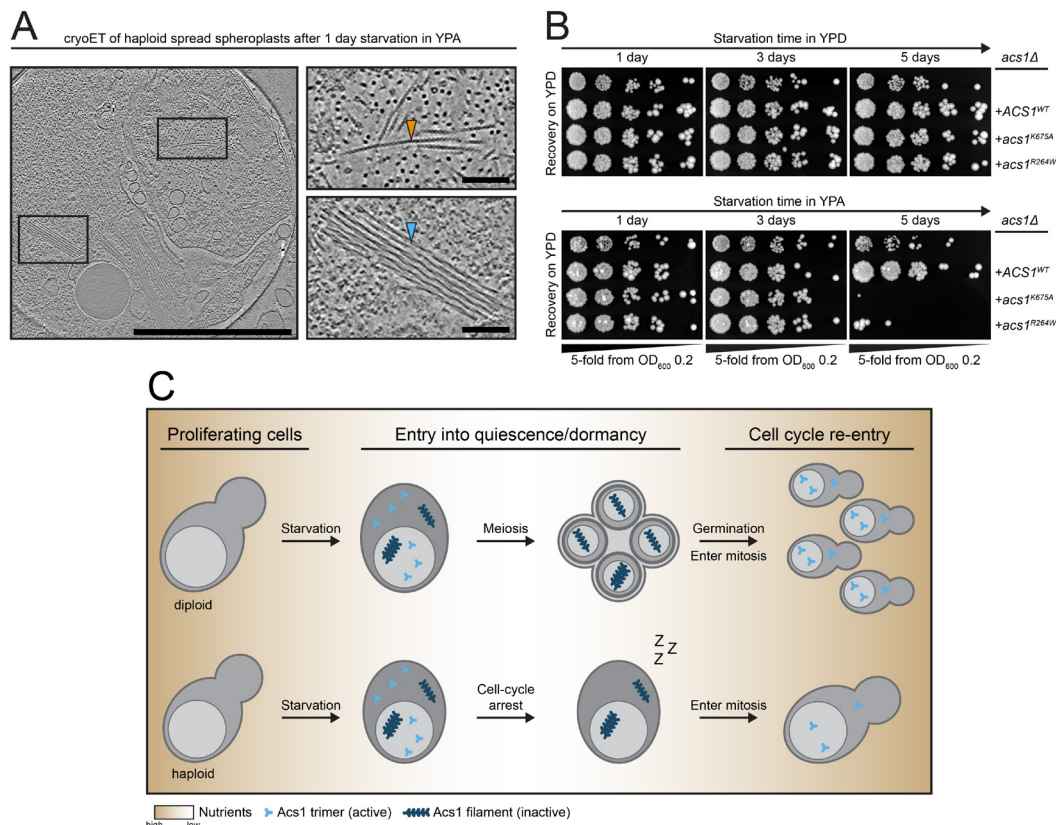

627

628 **Figure 7. Acs1 polymerization is a general response to starvation and required for efficient**  
 629 **recovery.**

630 (A) Acs1 and Ald4 form filaments also upon starvation independently from meiosis. Haploid yeast cells,  
 631 which are unable to enter meiosis, were starved for 1 day in YPA, spread onto EM grids, and processed  
 632 for cryoET. Shown is a 9.02 nm thick slice through a cryo-tomogram with magnified views on the right.  
 633 Orange arrowhead points to single Ald4 filament whereas the blue arrowhead points to an Acs1 filament  
 634 bundle. Scale bars: 1  $\mu$ m and 100 nm for magnified views.

635 (B) Acs1 filaments are needed for efficient recovery after starvation. Shown is a cell spotting assay for  
 636 the indicated genotypes. Cells were incubated for 1, 3, or 5 days in YPD or YPA medium before fivefold  
 637 serial dilutions were spotted on YPD plates. Note that after five days in YPA medium, deletion strains  
 638 complemented with *acs1*<sup>K675A</sup> and *acs1*<sup>R264W</sup> almost completely failed to recover. The experiment shown  
 639 is representative for two independent experiments.

640 (C) Model of Acs1 filament function. Starvation triggers entry into quiescence/dormancy via meiosis.  
 641 In the process, Acs1 expression is upregulated to promote acetyl-CoA production, which is required for  
 642 meiosis. Shortly after meiotic entry, Acs1 polymerizes and forms filament bundles that are inherited by  
 643 spores. In the filamentous form, Acs1 is inactive and acetyl-AMP-bound, unable to carry out the second  
 644 step in acetyl-CoA synthesis. After long periods of dormancy, the stored Acs1 is required for return to



645 proliferation. A similar mechanism operates in haploid cells to enable the return to growth from  
646 prolonged periods of starvation.

647

## 648 STAR METHODS

### 649 Experimental model and subject details

650 All strains used in this study are SK1 derivatives and the detailed genotypes are described in Table S2.  
651 The following alleles have been described previously: *ndt80Δ*, *Zip1-(700)-GFP*<sup>63,64</sup>. Gene deletions  
652 were introduced by PCR-based amplification of cassettes from the yeast knock-out collection<sup>65</sup>.  
653 Synthetic *ALD4*<sup>WT</sup> or *ald4*<sup>int</sup> (Lys60Glu, Lys249Glu, Ile250Ala, Gln369Ala, Asn373Ala, Lys377Ala,  
654 Asp380Ala, Asn384Ala) constructs including 500 base pairs (bp) upstream of ATG and 500 bp  
655 downstream of the terminator were cloned into the plasmid Yiplac128 (pML764) using HindIII and  
656 EcoRI restriction sites. The resulting plasmids (pML767 and pML776) were used to reconstitute an  
657 *ald4Δ* strain by the integration of the respective linearized vector variant into the promoter region of  
658 *ALD4* using SmaI. In all strains carrying *ACSI* variants, a synthetic *ACSI*<sup>WT</sup>-*6xHIS*-*6xFLAG* gene  
659 sequence construct including 301 bp upstream of ATG and 81 bp downstream of the terminator was  
660 cloned into the plasmid pYIplac211 (pML533) using HindIII and EcoRI restriction sites. Plasmids  
661 carrying *acsI*<sup>K675A</sup> (pML624) or *acsI*<sup>R264W</sup> (pML619) were generated by site-directed mutagenesis of  
662 pYIplac211-*ACSI*-*6xHIS*-*6xFLAG* (pML606). Reconstitution of *acs1Δ* strains with *ACSI*<sup>WT</sup> or with the  
663 *acsI* point mutants were performed by integration of the respective linearized vector variants into the  
664 promoter region of *ACSI* using Bsu36I. For C-terminal PCR-based tagging of chromosomal genes or  
665 tag exchange with yeast enhanced GFP (referred to in the text as GFP) cassette was amplified from a  
666 plasmid (pML100, Gift from Wolfgang Zachariae) with 50 bp overhangs homologous to 50 bp up- and  
667 downstream of the STOP codon<sup>66</sup>. To remove C-terminal tags, a cassette from pML702 with 50 bp  
668 overhangs at the C-terminus including the STOP codon was used. DNA cassettes were transformed into  
669 SK1 yeast strains using standard protocols.

### 670 Method details

#### 671 Generation of diploid strains and meiotic time courses

672 Meiotic time courses were performed as previously described<sup>23,24</sup>. In brief, haploid cells with opposite  
673 mating types were mated on YPD [1% (w/v) yeast extract, 2% (w/v) peptone, 2% (w/v) dextrose].  
674 Diploid cell colonies were then selected on YPG [1% (w/v) yeast extract, 2% (w/v) peptone, 2% (v/v)  
675 glycerol] plates for 48 h at 30 °C. Several colonies were picked and expanded on YPD plates for two  
676 times 24 h at 30 °C to form a lawn covering the whole plate. Afterwards, cells were inoculated in pre-  
677 sporulation medium [YPA, 1% (w/v) yeast extract, 2% (w/v) peptone, 2% (w/v) potassium acetate] at  
678 OD<sub>600</sub> ~0.3 and grown for 15 h at 25 °C or for 11 h at 30 °C, washed once in sporulation medium [SPM,  
679 2% (w/v) potassium acetate] and inoculated at OD<sub>600</sub> ~3.5 into SPM. This time was defined as t = 0 h

680 for all meiotic time courses. Cells were then sporulated at 30 °C and samples were taken at specific time  
681 points post transfer to SPM.

### 682 **Sporulation efficiency**

683 To assess sporulation efficiency, cells were inoculated in YPA to OD<sub>600</sub> ~0.3 and grown for 15 h at 25  
684 °C, washed once in SPM, and inoculated into SPM to OD<sub>600</sub> ~3.5. For the acute starvation procedure,  
685 cells were directly inoculated into SPM after expansion on YPD plates. An aliquot of cell suspension  
686 was collected after 12 h, 24 h, and 36 h in SPM and stored at -20 °C prior to light microscopy imaging.  
687 Samples were imaged with standard light microscopy systems. Areas with ascospores and cells were  
688 randomly picked, and Z-stacks were recorded in the Brightfield channel. Ascospores and cells were  
689 manually scored using Fiji <sup>67</sup>. 100-200 ascospores or cells were counted in three independent  
690 experiments. Ascospore formation was considered successful if the ascus contained at least two spores  
691 enclosed by a separate spore wall. Data analysis was performed in Excel (Microsoft) and Prism (version  
692 9.2.0 for Windows; GraphPad) software.

### 693 **Yeast spore germination imaging**

694 Sporulation cultures generated as described above were incubated for up to 56 days at 30 °C in SPM  
695 medium supplemented with Ampicillin (50 µg/ml). Every three days, fresh Ampicillin was added. For  
696 life cell imaging, samples were adjusted to an OD<sub>600</sub> ~1.7 in conditioned SPM before they were put in  
697 Concanavalin A (in 1M MnCl<sub>2</sub>, 1x PBS) coated imaging chambers [Nunc™ Lab-Tek™ II Chambered  
698 Coverglass, 8 Well, 1.5 Borosilicate Glass (LifeTech Cat 155409)]. After 3 min of incubation at RT,  
699 chambers were washed with conditioned SPM before synthetic medium [SC, 0.17% (w/v) yeast nitrogen  
700 base w/o ammonium sulphate and amino acids, 0.5% (w/v) ammonium sulphate, 1.1% casamino acids,  
701 0.0055% (w/v) for adenine, tyrosine, uracil, tryptophane and leucin in H<sub>2</sub>O] w/o glucose was added.  
702 Right before imaging, SC w/o glucose was exchanged with SC containing 2% (w/v) glucose. Live-cell  
703 imaging was performed on a DeltaVision Ultra Epifluorescence Microscope equipped with an Olympus  
704 UPlanXApo 40x/0.95 Corr objective, a sCMOS camera (pco.edge 4.2) and a full environmental chamber  
705 at 30 °C. 8 µm z-stacks in the DIC channel were collected every 5 min for a total duration of 9 h on pre-  
706 selected regions. Additionally, a UV blocking filter was applied.

707 Movies were analysed with Fiji imaging software. Single ascospores containing at least three visible  
708 spores enclosed by a separate spore wall were tracked over the entire movie. The time of initial cell  
709 cycle re-entry was defined as the appearance of the first budding spore of an ascus. 40 ascospores per  
710 genotype were inspected for each time point. Germination curves were generated in Excel (Microsoft)  
711 and Prism (version 9.2.0 for Windows; GraphPad) software.

## 712 **Yeast spot assays**

713 Haploid yeast cells were cultured in liquid YPD over night at 30 °C. In the morning, cells were diluted  
714 and inoculated at OD<sub>600</sub> ~0.1 in YPD or OD<sub>600</sub> ~0.2 in YPA medium supplemented with Ampicillin (50  
715 µg/ml) and incubated at 30 °C. Every three days, cell cultures were supplemented with fresh Ampicillin.  
716 For the starvation recovery spot assay, cells were harvested for each time point, washed once in H<sub>2</sub>O  
717 and spotted on YPD plates as 5-fold serial dilutions starting from OD<sub>600</sub> = 0.2. YPD plates were  
718 incubated for 48 h at 30 °C before they were imaged with a ChemiDoc Imaging System (BioRad).

## 719 **Protein analyses by western blotting**

720 Samples were processed as described previously (Matos et al., 2008). In short, cell pellets were  
721 disrupted in 10% TCA using glass beads on a FastPrep-24 (MP Biomedicals) running two cycles of 40  
722 s (6.5 m/s). The protein precipitates were resuspended in 2X NuPAGE sample buffer and neutralized  
723 with 1M TrisBase at a 2:1 ratio (v/v), boiled at 95°C for 10 min and cleared by centrifugation for another  
724 10 min. The relative protein concentration was assessed using the Bio-Rad protein assay. Protein  
725 samples were separated on NuPAGE 3-8% Tris-Acetate gels (Invitrogen) and transferred onto  
726 Amersham Hybond 0.45 µm PVDF membranes. For immunoblotting the following antibodies were  
727 used: mouse anti-GFP (1:2000, 11814460001 Roche), mouse anti-Cdc5 (1:2500, clone 4F10 MM-0192-  
728 1-100 MédiMabs), rabbit anti-Acs1 (1:5000, this publication), rabbit anti-Crm1 (1:5000, Onischenko E.  
729 et al., 2009). The following secondary HRP conjugated antibodies were used: 1:5000 goat anti-mouse  
730 immunoglobulin (P0447 Agilent) and 1:5000 swine anti-rabbit immunoglobulin (P0399 Agilent).

## 731 **FACS analysis of DNA content**

732 Cellular DNA content was determined as described previously<sup>68</sup>. 1 ml of meiotic cell culture was fixed  
733 in 70% (v/v) ice cold EtOH before cells were washed in 50 mM Tris-HCl pH 7.5 and resuspended in  
734 500 µl 50 mM Tris-HCl pH 7.5. RNA was digested o/n or for at least 4 h at 37 °C by adding 2 µl RNase  
735 (100 mg/mL) (Roche). Cells were washed in FACS buffer (200 mM Tris-HCl pH 7.5, 211 mM NaCl,  
736 78 mM MgCl<sub>2</sub>), resuspended in 500 µl FACS buffer containing 50 µg/ml propidium iodide and briefly  
737 sonicated. An aliquot of 40-60 µl was diluted in 1 ml of 50 mM Tris-HCl pH 7.5. Propidium iodide-  
738 stained DNA content was measured on a flow cytometer (FACSCalibur or LSRFortessa, Becton  
739 Dickinson). The cytometer data was analyzed using FlowJo software (Becton Dickinson).

## 740 **Fluorescence light microscopy**

741 Immunofluorescence stainings were performed as previously described<sup>69,70</sup>. The following primary  
742 antibodies were used: rabbit anti-GFP (1:600, a gift from Wolfgang Zachariae), rat anti- $\alpha$ -tubulin (1:600,  
743 Biorad MCA78G). Secondary antibodies coupled to Alexa 555 and Alexa 488 were used for detection  
744 (1:300, Invitrogen). DNA was stained with 4',6-diamidino-2-phenylindole (DAPI). Images were

745 acquired on a Zeiss Axio Imager M2 equipped with a 63x 1.4 Oil DIC M27 objective and a  
746 CoolSnapHQ2 camera under the control of ZEN blue 3.3. Image analysis was performed using Fiji.  
747 For direct fluorescent microscopy without prior staining, ~8 OD<sub>600</sub> units were harvested, concentrated,  
748 and fixed in 100 µl 4% PFA solution for 20 min at RT without shaking. Samples were then washed in  
749 1x PBS and resuspended for imaging. Images were acquired on a Zeiss Axio Imager M2 equipped with  
750 a 63x 1.4 Oil DIC M27 objective and a CoolSnapHQ2 camera under the control of ZEN blue 3.3, or on  
751 a Leica Thunder Imager 3D cell culture microscope equipped with a HC PL APO 100x/1.44 Oil CORR  
752 CS objective and a sCMOS camera (Leica DFC9000 GTC) under the control of LAS X (v 3.7.6)  
753 software. Images acquired at the Leica microscope were processed with large volume computational  
754 clearing (LVCC).

### 755 **Isolation of mitochondria and spreading on EM grids**

756 Crude mitochondrial fractions were isolated at a small scale as described previously<sup>32,71</sup>. Briefly, ~350  
757 OD<sub>600</sub> units were harvested, washed in water, and treated with 10 mM DTT in 100 mM Tris-SO<sub>4</sub> pH 9.4  
758 for 20 min at 30°C. After washing in zymolyase buffer (1.2 M sorbitol, 20 mM KP<sub>1</sub> pH 7.4), cells were  
759 resuspended in 1.5 ml zymolyase buffer containing 10 mg 20T zymolyase (Seikagaku Biobusiness) and  
760 incubated for 30 min at 30 °C. Spheroplasts were washed in zymolyase buffer and homogenized in  
761 homogenization buffer [0.6 M sorbitol, 10 mM Tris/HCl pH 7.4, 1 mM ethylenediaminetetraacetic acid  
762 (EDTA), 2 mM phenylmethylsulfonyl fluoride (PMSF), 0.2% (w/v) bovine serum albumin] by passing  
763 the cell suspension 20 times through a 0.8 × 22 mm cannula. Cell debris and nuclei were removed by  
764 centrifuging the suspension at 1,000 × g and crude mitochondria were isolated by centrifuging the  
765 supernatant at 12,000 × g for 15 min. The mitochondrial pellet was resuspended in SEM buffer (250  
766 mM sucrose, 1 mM EDTA, 10 mM MOPS/KOH pH 7.2) and the protein concentration was estimated  
767 against an Albumin standard by the Bradford method. Aliquots were snap-frozen in liquid nitrogen and  
768 stored at -80°C or directly used to apply on EM grids for plunge-freezing. For single-particle EM data  
769 acquisition, purified mitochondria were splashed by hypo-osmotic swelling. Samples were spun down  
770 at 20,000 × g for 10 min and pellets were resuspended in 10 mM MOPS pH 7.2. After 10 min on ice,  
771 the mitochondria suspension was plunge-frozen on EM grids.

### 772 **Preparation of spread yeast spheroplasts on EM grids**

773 The preparation of spread yeast spheroplasts on EM grids was adapted from chromosome surface spread  
774 protocols<sup>27,28</sup>. Briefly, ~3 OD<sub>600</sub> units of cell culture were harvested, spun down for 2 min at 800 ×g,  
775 resuspended in 200 µl of 1.2 M sorbitol in SPM and placed on ice. Cells were spheroplasted by adding  
776 2 µl of 1 M DTT (30 °C, 15 min), followed by 5 µl 100T Zymolyase (1 mg/ml) (Seikagaku Biobusiness)  
777 (30 °C, 15-30 min). From 8 min onwards, cells were regularly checked under the microscope to assess  
778 the level of spheroplasting by mixing 1 µl of spheroplast suspension with 5 µl water on a glass slide.

779 Spheroplasted cells appear dark, whereas non-spheroplasted cells have a bright halo. When most of the  
780 cell population is spheroplasted, 1 ml of ice-cold STOP solution (0.1 M MES, 1mM EDTA, 0.5 mM  
781 MgCl<sub>2</sub>, pH 6.4) was added. Spheroplasts were spun down at 800 × g for 2 min at 4 °C and carefully  
782 resuspended in 100-200 µl ice cold STOP solution. 10 µl of spheroplast suspension was then mixed with  
783 40 µl of 1% (v/v) Lipsol or 1% (v/v) NP-40 detergent immediately before adding them onto EM grids  
784 for plunge-freezing.

### 785 **Plunge-freezing**

786 Meiotic yeast cells were cultured and plunge-frozen as described previously<sup>25</sup> with minor modifications.  
787 Meiotic yeast cells were harvested and diluted to an OD<sub>600</sub> of 1-3 in SPM. Vegetatively growing cells in  
788 YPD were harvested at an OD<sub>600</sub> of ~0.8 and concentrated in SPM to OD<sub>600</sub> of 1-3 by spinning for 2 min  
789 at 650 × g. Yeast cells were kept on ice until they were plunge-frozen with a Vitrobot Mark IV (Thermo  
790 Fisher Scientific)<sup>72</sup>. 4 µl of cell suspension was applied onto the negatively glow-discharged EM grids  
791 (R2/2 Cu 200 mesh, specially treated, Quantifoil). Using a Teflon sheet on one side, grids were back-  
792 blotted either once for 5-6 s or twice for 3-5 s at 4 °C, 95% humidity, before plunging into the liquid  
793 ethane-propane mixture [37% (v/v) ethane]<sup>73</sup>. Intact and splashed mitochondria were prepared as  
794 described above. Samples were mixed with 10 nm BSA-coated colloidal gold particles  
795 (Cytodiagnosics) in a ratio of 5:1 and then 3 µl of sample was applied onto negatively glow-discharged  
796 EM grids (R2/2 or R2/1 Cu 200 mesh, specially treated, Quantifoil). Grids were back-blotted for 4-5 sec  
797 at 4 °C, 95% humidity and were plunge-frozen. Spread yeast spheroplasts were prepared as described  
798 above. The spheroplast Lipsol mixture was mixed with gold particles in a 10:1 ratio and then 3 µl of  
799 sample was applied onto the negatively glow-discharged EM grids (R2/1 Cu 200 mesh, specially treated,  
800 Quantifoil). Grids were back-blotted for 4-5 sec at 4 °C, 95% humidity and were plunge-frozen.

### 801 **Cryo-focused ion beam milling**

802 Due to the thickness of frozen-hydrated yeast cells, plunge-frozen cells were cryo-focused ion beam  
803 (FIB) milled with a Crossbeam 550 FIB-SEM instrument (Carl Zeiss Microscopy) before cryoET  
804 imaging as described previously<sup>25</sup>. The FIB-SEM instrument was equipped with an SE2 detector (Carl  
805 Zeiss Microscopy), an in-lens secondary electron detector (Carl Zeiss Microscopy), a copper band-  
806 cooled mechanical cryo-stage (Carl Zeiss Microscopy), and an integrated VCT500 vacuum transfer  
807 system (Leica Microsystems). In brief, plunge-frozen EM grids were clipped into FIB milling Autogrids  
808 (Thermo Fisher Scientific) and mounted onto a pre-tilted cryo-FIB Autogrid holder (Medeiros et al.,  
809 2018) (Leica Microsystems) using a VCM loading station (Leica Microsystems). Using the VCT500  
810 shuttle, the Autogrid holder was transferred to an ACE600 (Leica Microsystems) to cryo-sputter-coat  
811 the sample with a 4 nm thick layer of tungsten. Afterwards, the samples were loaded into the Crossbeam  
812 550 using the VCT500 vacuum transfer system. Inside the FIB-SEM, grids were additionally coated



813 with organoplatinum. Targets were selected with the SEM and automated sequential FIB milling was  
814 set up. A pattern with four currents was used (rough milling: 700 pA, 300 pA, and 100 pA; polishing:  
815 50 pA) for milling, targeting for a ~300 nm thick lamella. After milling, the Autogrid holder was  
816 transferred back to the VCM loading station with the VCT500 shuttle and grids were unloaded and  
817 stored in liquid nitrogen until cryoET imaging.

## 818 **CryoLM**

819 Plunge-frozen EM grids were imaged with a Zeiss LSM900 equipped with Airyscan2 detector and a  
820 Linkam CMS196V3 cryo-stage in a de-humidified room. EM grid overviews were collected with a  
821 5x/0.2 DIC C Epiplan-Apochromat objective to localize the regions of interest. Afterwards, z-stacks  
822 were collected with a 100x/0.75 DIC LD EC Epiplan-Neofluar (WD = 4 mm) objective. Confocal  
823 imaging tracks were used to visualize Acs1-GFP signal as well as the EM grid with transmitted and  
824 reflective light. Confocal imaging stacks were deconvolved with Zeiss LSM Plus processing and  
825 maximum intensity projections were generated in ZEN Blue (Carl Zeiss Microscopy, v.3.5) software.

826 CryoLM data was then used to correlate targets for cryoET data collection in x-y dimensions (described  
827 below) <sup>74</sup>. For that, cryo-LM images were imported into SerialEM <sup>75</sup> and aligned to the corresponding  
828 EM overviews based on prominent landmarks. To visualize correlated cryoLM and cryoEM images after  
829 data collection, low-magnification EM overviews were low-pass filtered using ‘mtfilter’ and converted  
830 to tiff files using ‘mrc2tif’ in IMOD package <sup>76</sup>. These images together with the cryoLM data were  
831 imported in ZEN Connect (within ZEN Blue, Carl Zeiss Microscopy, v.3.5) for correlation with the  
832 Point Alignment Wizard.

## 833 **CryoET data collection, reconstruction, and segmentation**

834 CryoET datasets were collected on Titan Krios transmission electron microscopes (TEM) (Thermo  
835 Fisher Scientific) operating at 300 kV and equipped with Quantum LS filter and K2 Summit direct  
836 electron detectors (Gatan) (Krios1), equipped with Quantum LS filter and K3 direct electron detectors  
837 (Gatan) (Krios2), and BioContinuum imaging filter and K3 direct electron detectors (Gatan) (Krios3).  
838 Low magnification overviews were recorded for navigation and targets were selected for the subsequent  
839 tilt series collection using SerialEM <sup>75</sup>.

840 For lamellae, tilt series collections were performed using a bidirectional scheme with an angular range  
841 between  $\pm 70^\circ$  to  $\pm 50^\circ$ , depending on the pre-tilted geometry of lamella, with  $2^\circ$  increment at a defocus  
842 of -8  $\mu\text{m}$ . The pixel sizes in different datasets were 4.34  $\text{\AA}$  (Krios1) or 4.51  $\text{\AA}$  (Krios3) or 4.57  $\text{\AA}$  (Krios2)  
843 at the specimen levels. The accumulated dose per tilt series is  $\sim 120 \text{ e}^-/\text{\AA}^2$ . For purified mitochondria, tilt  
844 series collections were performed using a dose-symmetric scheme with an angular range between  $+60^\circ$   
845 to  $-60^\circ$  with  $2^\circ$  increment at a defocus of -8  $\mu\text{m}$ . The pixel size was 2.75  $\text{\AA}$  (Krios1) or 2.68  $\text{\AA}$  (Krios3)

846 at the specimen level and the total dose per tilt series is  $\sim 160 \text{ e}^-/\text{\AA}^2$ . For spread yeast spheroplasts, the  
847 same collection scheme was used as for purified mitochondria and the pixel sizes at the specimen level  
848 were the same as for the lamella. The total dose per tilt series is  $\sim 130 \text{ e}^-/\text{\AA}^2$ .

849 Frames were aligned using ‘alignframes’ and tomograms were reconstructed using the IMOD package  
850 <sup>76</sup>. Tomograms shown in the figures were binned at the level of 4 and the contrasts were improved using  
851 the deconvolution filter ‘tom\_deconv’ <sup>77</sup>.

852 AI-based segmentations were generated in Dragonfly software (Object Research Systems, v. 2022.2) as  
853 described previously <sup>78</sup>. Briefly, filtered tomograms were loaded into Dragonfly and further processed  
854 by histogram equalization, Gaussian and Unsharp filtering. Afterwards, a U-Net (with 2.5D input of 5  
855 slices) was trained to recognize background voxels, filaments, and membranes within the tomograms.  
856 All AI-segmentations were manually cleaned up in Dragonfly, exported as binary tiff files and converted  
857 to mrc files using ‘tif2mrc’ in IMOD. Segmentations were visualized in UCSF ChimeraX <sup>79</sup>.

### 858 **Sub-tomogram averaging**

859 Sub-tomogram averaging of filaments from different datasets was performed in Dynamo software <sup>80</sup>.  
860 The individual filaments were manually picked from reconstructed tomograms at a binning factor of 4  
861 using the ‘filamentWithTorsion’ model in Dynamo. The different filaments were segmented with the  
862 corresponding inter-segment distance (8.8 nm for Ald4 dataset, 5.5 nm for Acs1 dataset) before particle  
863 cropping. The cropped sub-volumes from each dataset (Ald4 filaments in the isolated mitochondria: 564  
864 particles from 3 tomograms; Acs1 filaments in the spread yeast spheroplasts: 452 particles from 3  
865 tomograms) were assigned random azimuth orientations using ‘dynamp\_table\_randomize\_azimuth’ and  
866 were firstly subjected to the averaging without imposing symmetry. The symmetry information of  
867 individual filaments was then deduced from the asymmetric reconstruction and was applied in the  
868 downstream averaging analyses. All particles were subjected to one round of coarse alignment with  
869 rough angular search steps, and the particles were then split into half-datasets based on the odd-and-  
870 even order with ‘dteo’ package in Dynamo. Each half-dataset was subjected to fine alignment with  
871 precise angular search steps against the same reference. The Acs1 dataset was analyzed using fine  
872 alignment at the binning factor of 2, while the Ald4 dataset was analyzed at the binning factor of 4. The  
873 final averaged volumes from individual half-datasets were used to estimate the resolution based on the  
874 Fourier shell correlation (FSC) <sup>81</sup> using ‘reliion\_postprocess’ <sup>82</sup>. The final resolution of averaged maps  
875 of Ald4 filaments from intact mitochondria was 44 Å, whereas the resolution of Acs1 filaments from  
876 spread yeast spheroplasts was 18.3 Å.



## 877 **CryoEM single-particle data collection**

878 CryoEM data collection parameters are summarized in Table S1. CryoEM datasets of Ald4 filaments  
879 from spread yeast mitochondria were collected at a nominal magnification of  $81,000\times$  (an effective  
880 pixel size of  $0.55\text{ \AA}$  at super-resolution) using the SerialEM program on Krios2. Low magnification  
881 overviews were recorded for navigation purposes to target filaments and the data was collected as movie  
882 stack in super-resolution mode, with the 2.5 s total exposure time at a defocus value from  $-1.2$  to  $-2.8$   
883  $\mu\text{m}$ . Each stack contains 50 frames, and the accumulated electron dose was  $\sim 60\text{ e}^-/\text{\AA}^2$ . The frames of the  
884 stack were aligned and applied with dose weighting at the binning factor of 2 using ‘MotionCor2’<sup>83</sup> (an  
885 effective pixel size of  $1.1\text{ \AA}$ ). The CTF parameters of micrographs were estimated using ‘Gctf’<sup>84</sup>. A  
886 total of 531 micrographs in two batches were collected for image processing.

887 CryoEM datasets of Acs1 filaments from spread yeast spheroplasts were collected at a nominal  
888 magnification of  $130,000\times$  (an effective pixel size of  $0.535\text{ \AA}$  at super-resolution) using the SerialEM  
889 program on Krios1. The data collection strategy was performed same as above. The data was collected  
890 as movie stack in super-resolution mode, with the 8 s total exposure time. Each stack contains 32 frames  
891 and the accumulated electron dose was  $\sim 60\text{ e}^-/\text{\AA}^2$ . The motion correction and CTF parameter estimation  
892 were performed the same as above (an effective pixel size of  $1.07\text{ \AA}$ ). A total of 1,084 micrographs were  
893 collected for image processing.

## 894 **CryoEM image processing, identification of Ald4, and structural modeling**

895 To determine the structure of the filament observed in the mitochondria, 132 micrographs in the first  
896 batch of dataset were used to generate an initial model (Figure S3A). Briefly, the filaments were  
897 manually picked using Relion 3.0<sup>85</sup> and 22,365 segments were extracted with an inter-box distance of  
898  $42\text{ \AA}$ . One round of 2D classification at the binning factor of 4 was performed to remove bad particles,  
899 and the particles in good classes were then subjected to 3D refinement without imposing helical  
900 parameter but with 2-fold symmetry that was deduced from the sub-tomogram averaged volume. The  
901 initial helical parameters were interpreted from the reconstructed map using ‘relion\_helix\_toolbox’<sup>86</sup>  
902 and were then applied and locally refined in the following helical reconstruction<sup>86</sup>. The bad particles  
903 were further removed by one round of 2D classification without sampling after helical reconstruction  
904 and the following 2D classification. A total of 11,863 particles were used to reconstruct  $\sim 6.8\text{ \AA}$   
905 resolution of filament structure at the binning factor of 2, which was imposed a 2-fold symmetry and  
906 helical parameters (twist =  $96.2^\circ$ , rise =  $42.2\text{ \AA}$ ).

907 To identify the components in the filament assembly, the molecular weight of the sought-after protein  
908 was firstly estimated to be  $\sim 30\text{-}70\text{ kDa}$  based on the volume size of one filament subunit. To shortlist  
909 potential candidates, we cross-compared mass spectrometry (MS) data of mitochondrial matrix/inner  
910 membrane proteins<sup>32</sup> and MS data covering protein expression profiles in meiosis<sup>31</sup> (Table S3).

911 Providing this list to structural docking of AlphaFold<sup>29,30</sup> predicted candidate protein structures showed  
912 that the Ald4 protein fits the map.

913 To further verify the protein identity, we continued image processing using 531 micrographs collected  
914 in two batches. Since Ald4 homolog protein was reported to form a tetramer in solution and crystal  
915 structure (Aldh2, PDB entry: 1NZZ)<sup>33</sup>, there were still two symmetry possibilities for the filament  
916 assembly: proteins form a dimer (C2 symmetry) or tetramer (D2 symmetry) and then assemble into the  
917 filament. The different symmetry possibilities would request different inter-box distance for filament  
918 segmentations.

919 To investigate this, we first assumed C2 symmetry and segmented the filaments with an inter-box  
920 distance of 42.2 Å. The extracted segments were subjected to 2 rounds of 2D classifications at the  
921 binning factor of 4 and 2, and the particles in good classes were used for helical reconstruction at the  
922 binning factor of 1, where the helical parameters (twist = 96.2°, rise = 42.2 Å) were applied and  
923 optimized during refinement. A final 4.2 Å resolution filament structure was determined, however, the  
924 densities around the secondary structure (e.g.,  $\alpha$  helices) were unreasonable, suggesting that a wrong  
925 symmetry was applied. Thus, we switched to D2 symmetry in the following image processing. The  
926 filaments were segmented with an inter-box distance of 84.4 Å and were extracted with a larger box size  
927 (320 pixels). The particles were subjected to a round of 2D classification at the binning factor of 4 and  
928 the particles in good classes were used for the helical reconstruction at the binning factor of 1. A filament  
929 structure with 6.6 Å resolution was determined, assuming C2 and helical symmetry (twist = 96.2°, rise  
930 = 84.6 Å). Moreover, 2D classification analysis revealed that tetramers adopt two different types of  
931 stacking for the filament assembly: helical and non-helical (Figure S3B). To further improve the  
932 resolution, the central tetramer in each segment was centered and re-extracted using a smaller box size  
933 (200 pixels) (Figure S3A). The particles with smaller box sizes were then subjected to 3D refinement  
934 followed by local 3D classification. The particles in good 3D classes were combined and were subjected  
935 to the next round of 3D refinement imposed C2 and local symmetry (D2). One round of CTF parameter  
936 optimization and particle polishing were further applied to improve the map quality. A final resolution  
937 of 3.8 Å structure was determined from 29,307 particles assuming C2 and local symmetry (together in  
938 D2 symmetry). The map quality was further improved using ‘deepEMhancer’<sup>87</sup>. The local resolution  
939 was estimated using Relion (Figure S3C).

940 The structure was manually refined in COOT<sup>88</sup>, the models were further refined in real-space using  
941 iterative refinements of RosettaCM<sup>89</sup> and ‘phenix.real\_space\_refine’<sup>90</sup>. The refined model was  
942 evaluated using ‘phenix.molprobity’<sup>90</sup> and the model vs. map FSC was calculated using  
943 ‘phenix.mtrifage’<sup>90</sup> (Figure S3D-E). In the final atomic model of an Ald4 filament subunit, 24 residues  
944 of the N-terminus were missing due to invisible densities. The bound NAD molecule was included in  
945 the final model (Table S1).

946 The surface contact sites between Ald4 tetramers were firstly analyzed by PDBePISA ['Protein  
947 interfaces, surfaces and assemblies' service PISA at the European Bioinformatics Institute.  
948 ([http://www.ebi.ac.uk/pdbe/prot\\_int/pistart.html](http://www.ebi.ac.uk/pdbe/prot_int/pistart.html)), <sup>91</sup>] and were then manually checked in COOT.

#### 949 **CryoEM image processing, identification of Acs1, and structural modeling**

950 To generate the initial filament model and estimate the helical parameters, micrographs of 0° tilt in the  
951 datasets of spread yeast spheroplasts were used for the processing (Figure S6A). The filaments were  
952 picked manually with the start-end coordinate pairs using Relion 3.0. The filaments were segmented  
953 with an inter-box distance of 60 Å and were then subjected to 2 rounds of 2D classifications. The  
954 particles in the good classes were selected for 3D auto-refinement using helical reconstruction without  
955 imposing helical symmetry but with 3-fold symmetry that was deduced from sub-tomogram averaged  
956 volume. The helical parameters were estimated from the initial reconstruction in real space using  
957 'relion\_helix\_toolbox' and were optimized for the second round of 3D auto-refinement at the binning  
958 factor of 4. The refined helical parameters were: twist = 13.58°, rise = 54.62 Å.

959 To determine the high-resolution filament structure, 1,084 micrographs were collected as mentioned  
960 above and used for the imaging processing. The filaments were manually picked and 108,349 segments  
961 were extracted with an inter-box distance of 55 Å. Bad particles were removed through 2 rounds of 2D  
962 classifications at the binning factors of 4 and 2 (Figure S6B). The particles in good classes were then  
963 applied to the helical reconstruction at the binning factor of 2, where the helical parameters from the  
964 reconstruction of 0° tilt were applied and locally refined in the follow-up processing steps. One round  
965 of 2D classification without sampling was performed after helical reconstruction to remove the mis-  
966 aligned particles. The remaining particles were subjected to the 3D helical reconstruction at the binning  
967 factor of 1 and a subsequent round of 2D and 3D classifications without sampling. The particles from  
968 good classes were then subjected to another round of 3D classification and only one 3D class (class IV  
969 in Figure S6B) was used for the helical reconstruction. One round of CTF parameters optimization and  
970 particle polishing were further performed to improve the map quality. The final 3.5 Å resolution filament  
971 structure was determined from 17,169 particles imposing 3-fold symmetry and helical parameters (twist  
972 = 13.03°, rise = 53.61 Å) (Figure S6B). The map quality was further improved using 'deepEMhancer'.  
973 The local resolution was estimated using Relion (Figure S6C).

974 To identify the components in the filament assembly, the C $\alpha$  backbone of one filament subunit was  
975 manually traced in COOT and was then subjected to DALI search  
976 (<http://ekhidna2.biocenter.helsinki.fi/dali/>) <sup>35</sup>, which revealed the Acs1 protein as a potential candidate.  
977 The crystal structure of Acs1 protein (PDB entry: 1RY2) <sup>36</sup> was then docked into the map and manually  
978 refined using COOT and then subjected to the same refinements and structural validation as mentioned  
979 above for Ald4 (Figure S6D-E). In the final atomic model of Acs1 filament subunit, 37 residues in the

980 N-terminus were missing due to invisible densities. The intermediary product acetyl-AMP was included  
981 in the final model (Table S1).  
982

## 983 SUPPLEMENTARY FIGURES

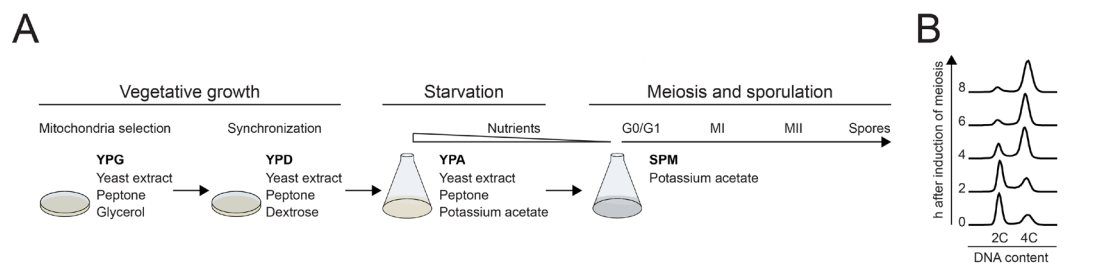

984

### 985 **Figure S1. Meiotic time course.**

986 (A) Schematic representation of the experimental setup to perform a meiotic time course. Vegetatively  
987 growing diploid *S. cerevisiae* cells were plated for single colonies on YPG plates to select for strong  
988 respiratory growth. Single colonies were then expanded before they were starved in YPA medium  
989 containing the non-fermentable carbon source potassium acetate. Arrested cells at G0/G1 were  
990 transferred to sporulation medium (SPM) lacking the nitrogen source in order to induce the meiotic cell  
991 division program (Pre-meiotic G0/G1, first meiotic division MI; second meiotic division MII, and spore  
992 formation).

993 (B) FACS analysis of the DNA content to monitor meiotic progression. DNA content of meiotic cell  
994 cultures was analyzed by FACS at regular time intervals after the induction of meiosis (transfer of cells  
995 to SPM). Note that most of the cells duplicated their genomes after ~4 h in SPM. Shown is a  
996 representative time course.

997

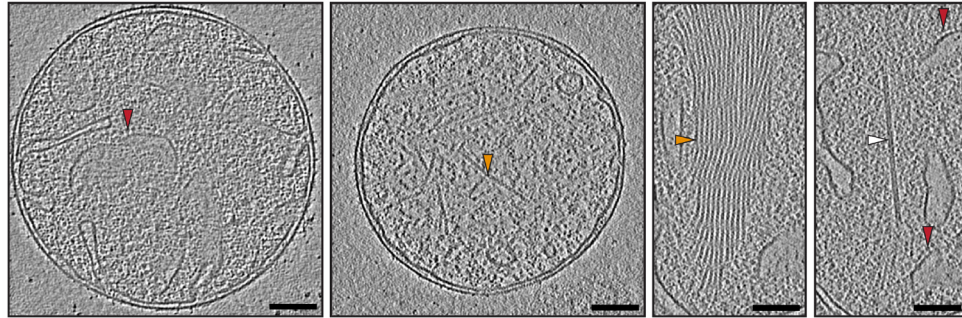

998

999 **Figure S2. CryoET of purified meiotic mitochondria.**

1000 Visualization of the ultrastructure of purified mitochondria. Shown are example slices through cryo-  
1001 tomograms of purified mitochondria from meiotic cell cultures collected between 6-8 h after induction  
1002 of meiosis. Red arrowheads point to putative F<sub>0</sub>F<sub>1</sub>-ATP synthases on cristae. Orange arrowheads show  
1003 single filaments and arrays as seen in Figure 3A, whereas the white arrowhead points to a different type  
1004 of filament within purified mitochondria. Shown are projections of 5.5 nm thick slices. Scale bars: 100  
1005 nm.

1006



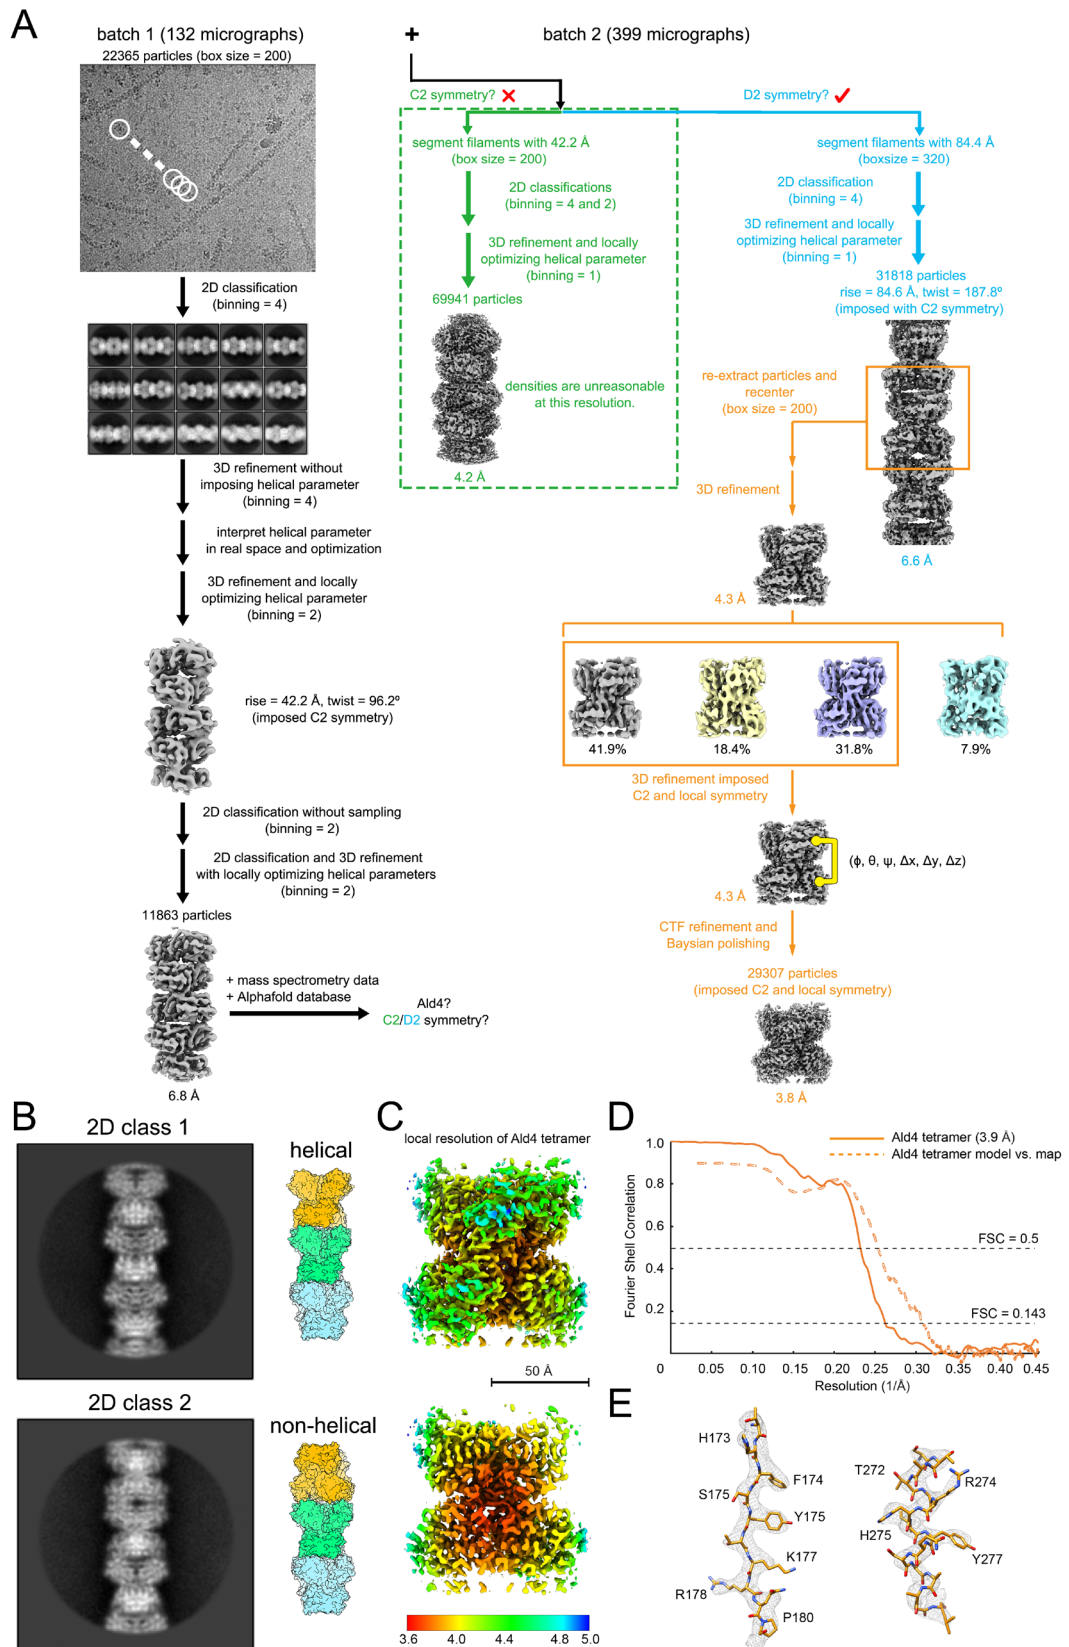

1007

1008 **Figure S3. Flowchart of processing cryoEM data for Ald4 filaments.**

1009 **(A)** Flowchart for the cryoEM reconstruction of the Ald4 filament. See METHODS and Supplementary  
1010 Table S1 for details.

1011 **(B)** Representative 2D classes and the corresponding schematics showing that Ald4 tetramers follow  
1012 two different stacking manners for the filament assembly: helical (top) and non-helical (bottom).  
1013 Individual tetramers are colored in orange, green, and blue respectively.

1014 **(C)** Local resolution (indicated by colors in Å) maps of the Ald4 tetramer. Scale bar: 50 Å.

1015 **(D)** Plots showing the gold standard FSC curve of the cryoEM reconstruction of the Ald4 tetramer  
1016 (orange) and the corresponding model vs. map FSC curve (dashed orange).

1017 **(E)** Stick and density mesh diagrams showing representative density maps of the Ald4 tetramer. Stick  
1018 models and density meshes are colored orange and gray respectively.

1019

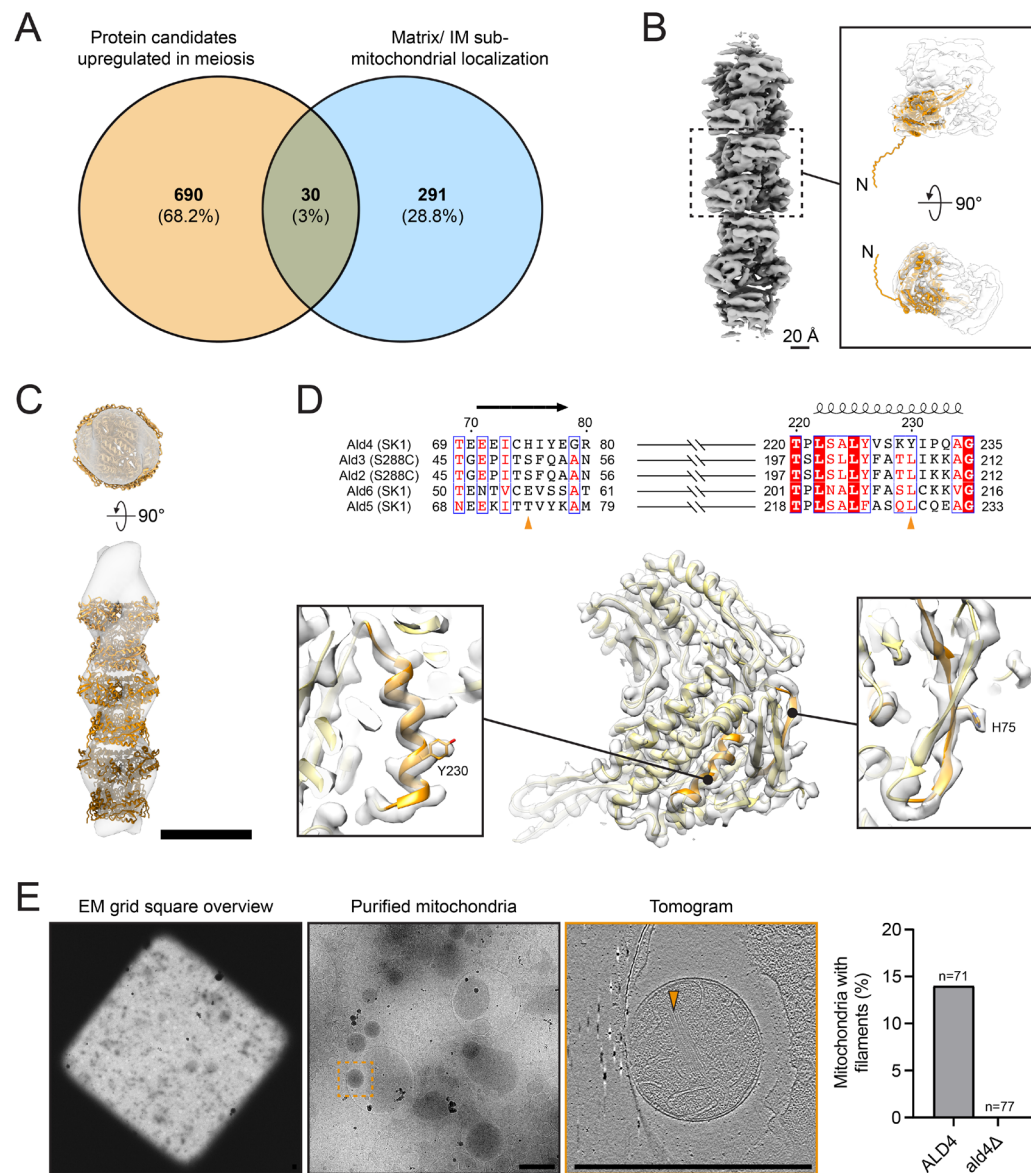

1020

1021 **Figure S4. Validation of Ald4 protein identity.**

1022 (A) Comparing data obtained from two independent mass spectrometry analyses yields 30 candidate  
 1023 proteins forming the mitochondrial filaments. Shown is a Venn diagram with proteins upregulated in  
 1024 meiosis<sup>31</sup> colored orange together with high confidence mitochondria proteins, which localize to the  
 1025 mitochondrial matrix or inner membrane (IM) colored blue<sup>32</sup>. Percentage of total input is indicated in  
 1026 each bin.

1027 (B) Ribbon and shadowed surface diagrams showing that Ald4 is a potential candidate from (A) forming  
 1028 the mitochondrial filaments. Left: the helical reconstructed map of the mitochondrial filament. One  
 1029 helical repeat is highlighted with a dashed black box. Right: docking of the predicted Ald4  
 1030 structure from AlphaFold<sup>29,30</sup> (orange) into one subunit of one helical repeat.

1031 **(C)** Docking of the high-resolution structure of three Ald4 tetramers with the sub-tomogram averaged  
1032 volume of Ald4 filaments from splashed mitochondria. Three layers of Ald4 tetramers are shown as  
1033 ribbons and are colored in different shades of orange as in Figure 4D, while the averaged volume (also  
1034 shown in Figure 3B) is transparent and colored gray. Scale bar: 10 nm.

1035 **(D)** Reconstructed map unambiguously identifies Ald4 as the only filament component. Top: sequence  
1036 alignments of different Ald isoforms (Ald4-6 from SK1 strain, Ald2-3 from S288C strain). Identical  
1037 residues are shown in white on a red background, while similar residues are shown in red. The blue  
1038 boxes indicate the conserved positions. The secondary structure of Ald4 is shown above the  
1039 corresponding sequences. The image is made using Esript<sup>92</sup>. Two distinguishing residues of Ald4 (H75  
1040 and Y230) are highlighted by orange arrowheads and are shown in the bottom panel. Bottom: ribbon  
1041 and shadowed surface diagrams showing the fitting of the Ald4 model with the reconstructed map. The  
1042 density map is colored gray and is shown transparent, while the overall model is colored yellow. The  
1043 aligned parts shown on the top panel are colored orange, while zoom-ins show the densities of two  
1044 distinguishing residues (H75 and Y230).

1045 **(E)** Mitochondrial filament arrays consist of Ald4. Left to right: to check for the presence of filaments,  
1046 purified mitochondria from meiotic cell cultures are picked in the EM grid square overview followed by  
1047 cryoET imaging. The corresponding 5.5 nm thick slice of the cryo-tomogram shows an example  
1048 mitochondrion containing filaments. Scale bars: 1  $\mu$ m. Right: shown are percentages of meiotic  
1049 mitochondria (6 h after induction of meiosis) containing filaments and the total number of mitochondria  
1050 (n) analyzed for each genotype are indicated.



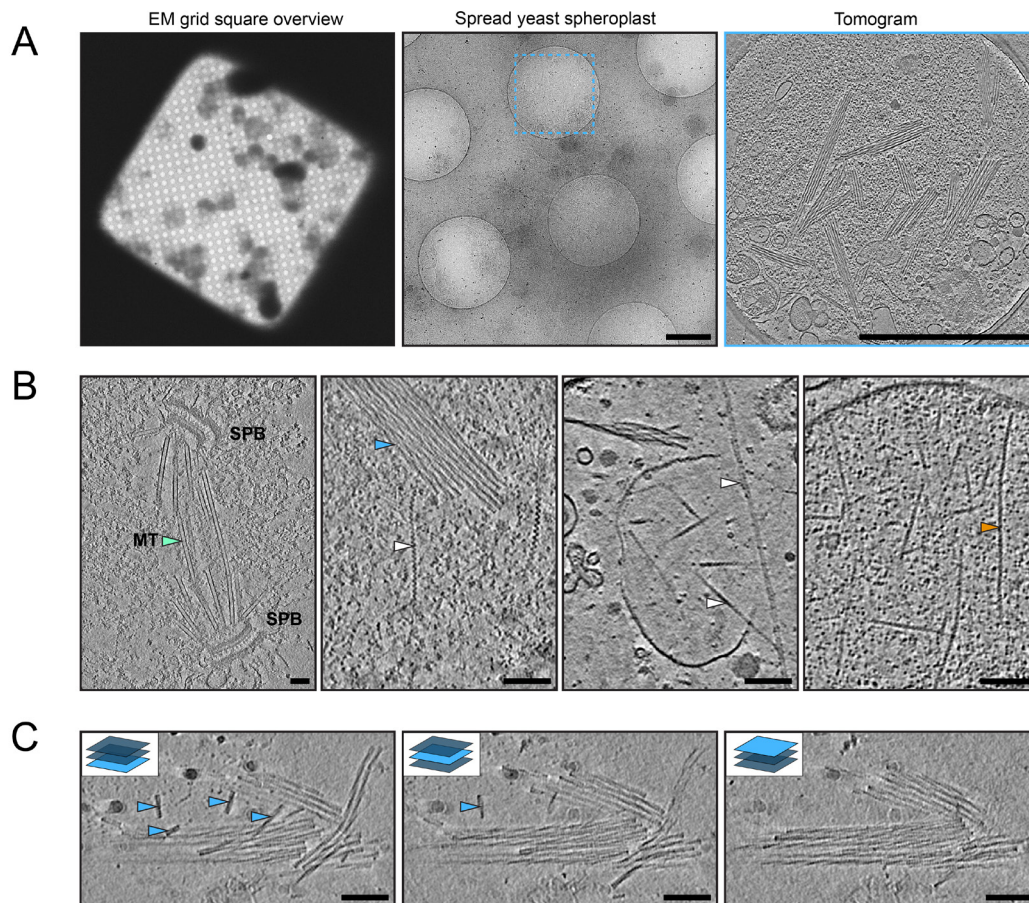

1051

1052 **Figure S5. CryoET on spread spheroplasts.**

1053 **(A)** Spread yeast spheroplasts allow for direct cryoET imaging. Left: overview of an example EM grid  
1054 square with spheroplasts. Middle: cryoEM micrograph of an example spread spheroplast from a *ndt80Δ*  
1055 strain arrested in prophase I, 8 h post induction of meiosis. Right: slice through the cryo-tomogram  
1056 collected on parts of the spread indicated by the blue box. Note that straight filament assemblies in  
1057 different directions can be observed as shown in Figure 4A. Shown is a projection of 9.14 nm thick  
1058 slices. Scale bars: 1  $\mu\text{m}$ .

1059 **(B)** Spread yeast spheroplasts enable the visualization of various macromolecular assemblies. Shown  
1060 are example slices through cryo-tomograms of spreads from meiotic cell cultures. Green arrowhead  
1061 points to microtubules (MT) branching from spindle pole bodies (SPB). Blue arrowhead shows filament  
1062 bundles, orange arrowhead shows single filaments in spread mitochondria, white arrowheads point to  
1063 other types of filaments. Shown are projections of either 8.68 nm or 9.14 nm thick slices. Scale bars:  
1064 100 nm.

1065 **(C)** Slice through cryo-tomogram of potential filament bundle (dis-)assembly intermediates. Note that  
1066 short single filaments point towards a bundle containing multiple long filaments. Short filaments are

1067 highlighted with blue arrowheads. Shown are projections of 9.14 nm thick slices at different z-heights  
1068 of the tomogram, which are 7.31 nm apart. Scale bar: 100 nm.  
1069



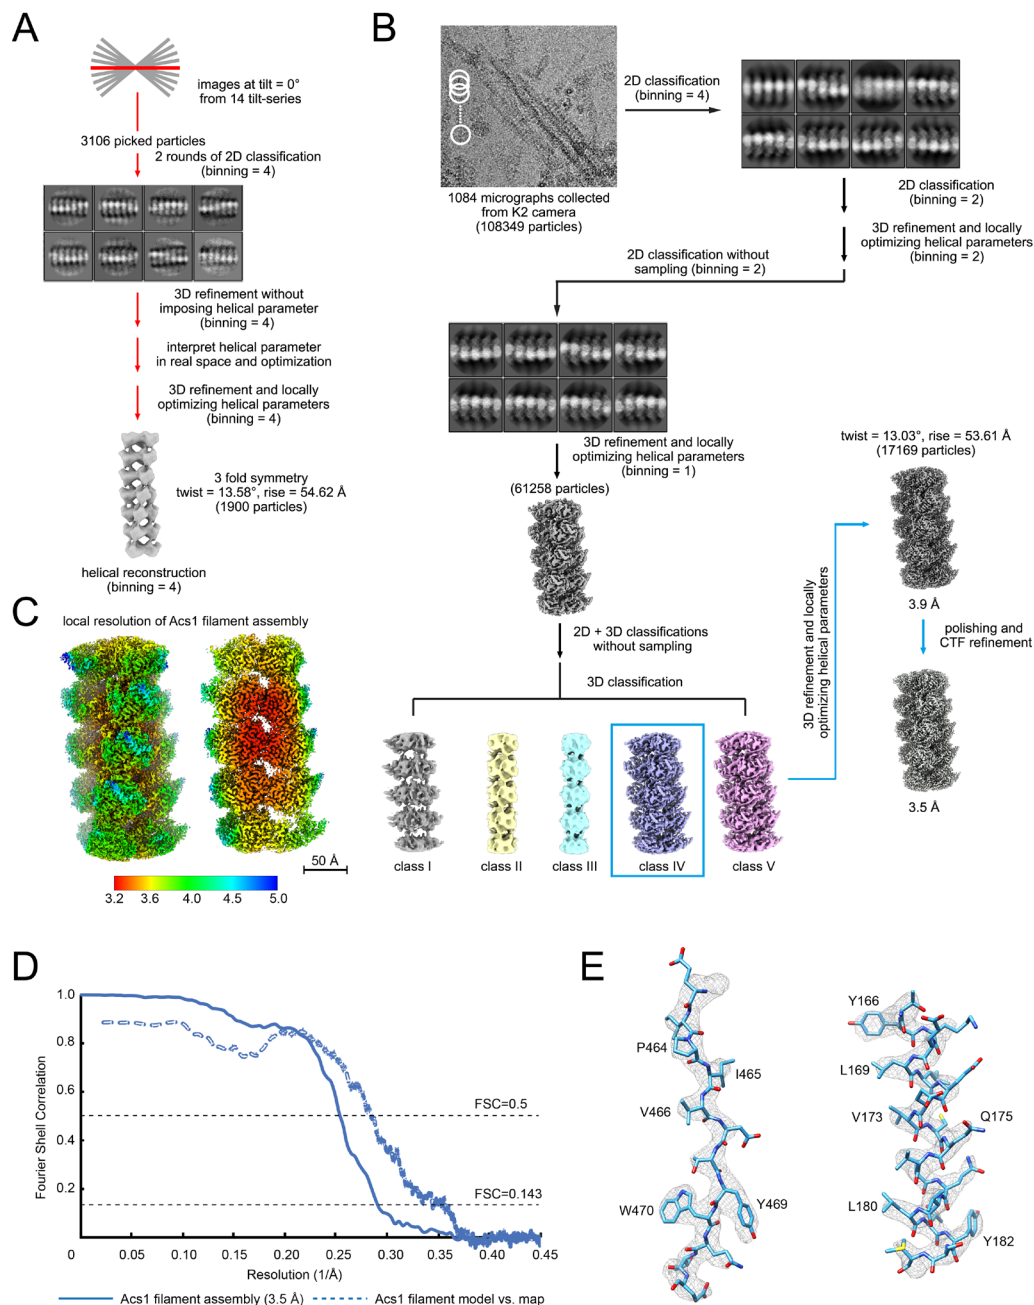

1070

1071 **Figure S6. Flowchart of processing cryoEM data for Acs1 filaments.**

1072 **(A)** Flowchart to generate the initial filament model and to determine the initial helical parameters using  
1073 individual images (tilt = 0°) from different tilt series. See METHODS for details.

1074 **(B)** Flowchart for the cryoEM reconstruction of Acs1 filament. See METHODS and Supplementary  
1075 Table S1 for details.

1076 **(C)** Local resolution (indicated by colors in Å) maps of the Acs1 filament structure. Scale bar: 50 Å.

1077 **(D)** Plots showing the gold standard Fourier Shell Correlation (FSC) curve of the cryoEM reconstruction  
1078 of Acs1 filament (blue) and the corresponding model vs. map FSC curve (dashed blue).

1079 **(E)** Stick and density mesh diagrams showing the representative density maps of the Acs1 filament  
1080 structure. Stick models and density meshes are colored blue and gray respectively.  
1081

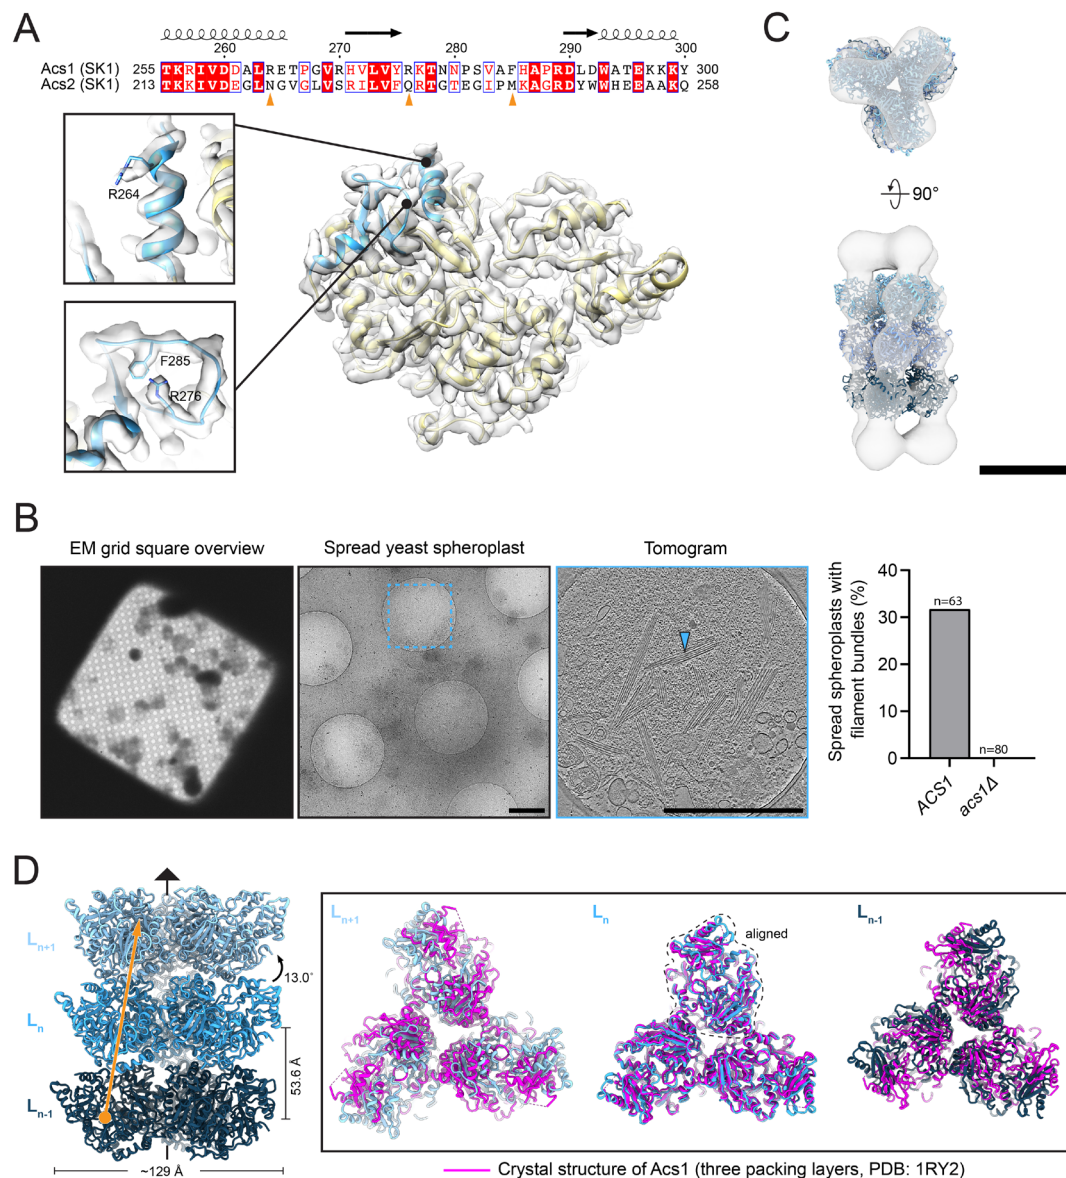

1082

1083 **Figure S7. Validation of Acs1 protein identity.**

1084 (A) Reconstructed map unambiguously identifies the Acs1 trimer as the only filament component. Top:  
 1085 sequence alignments of Acs1 and its isoform Acs2 from the SK1 strain. The identical residues, similar  
 1086 residues, and the conserved positions are shown in the same style as in Figure S4D. The secondary  
 1087 structure of Acs1 is shown above the corresponding sequences. Three distinguishing residues of Acs1  
 1088 (R264, R276, and F285) are highlighted by orange arrowheads and are shown on the bottom panel.  
 1089 Bottom: ribbon and shadowed surface diagrams showing the fitting of Acs1 model with the  
 1090 reconstructed map. The density map is colored gray and is shown in transparent, while the overall model  
 1091 is colored yellow. The aligned parts shown on the top panel are colored blue, while zoom-ins show the  
 1092 densities of three distinguishing residues (R264, R276, and F285).

1093 **(B)** Filament bundles consist of Acs1. Left to right: to check for the presence of filament bundles, spread  
1094 spheroplasts are picked in the EM grid square overview. Afterwards, cryoEM micrographs or  
1095 tomograms, if needed, are collected to assess whether filament bundles are present (highlighted with a  
1096 blue arrowhead). Scale bars: 1  $\mu\text{m}$ . Shown are the same images as in Figure S5A. Right: shown are  
1097 percentages of meiotic spread spheroplasts (6 h after induction of meiosis) containing filament bundles  
1098 and the total number of spreads (n) analyzed for each genotype are indicated.

1099 **(C)** Docking of the high-resolution structure of Acs1 filament fits the sub-tomogram averaged volume  
1100 of Acs1 filaments from spread yeast spheroplasts as shown in Figure 4B. Three layers of Acs1 trimers  
1101 are shown in ribbon and colored in different shades of blue as in Figure 4D, while the averaged volume  
1102 is transparent and colored gray. Scale bar: 10 nm.

1103 **(D)** Structural superimposition of Acs1 in the filament assembly and the crystal packing (PDB entry:  
1104 1RY2)<sup>36</sup>. Left: Ribbon diagrams showing three layers of Acs1 trimers, which are colored in different  
1105 shades of blue as in Figure 4D. The helical parameters (twist = 13.0°, rise = 53.6 Å) are labeled and a  
1106 single strand is marked with an orange arrowhead. The 3-fold axis is represented by a triangle. Right:  
1107 Magnified top view of three individual consecutive layers in the Acs1 filament aligned with the crystal  
1108 packing of yeast Acs1 based on the structural superimposition of the central layer ( $L_n$ ). Note that the  
1109 central layer is nicely aligned, while the neighboring layers ( $L_{n+1}$ ,  $L_{n-1}$ ) mismatch due to the helical twist  
1110 in the Acs1 filament.

1111

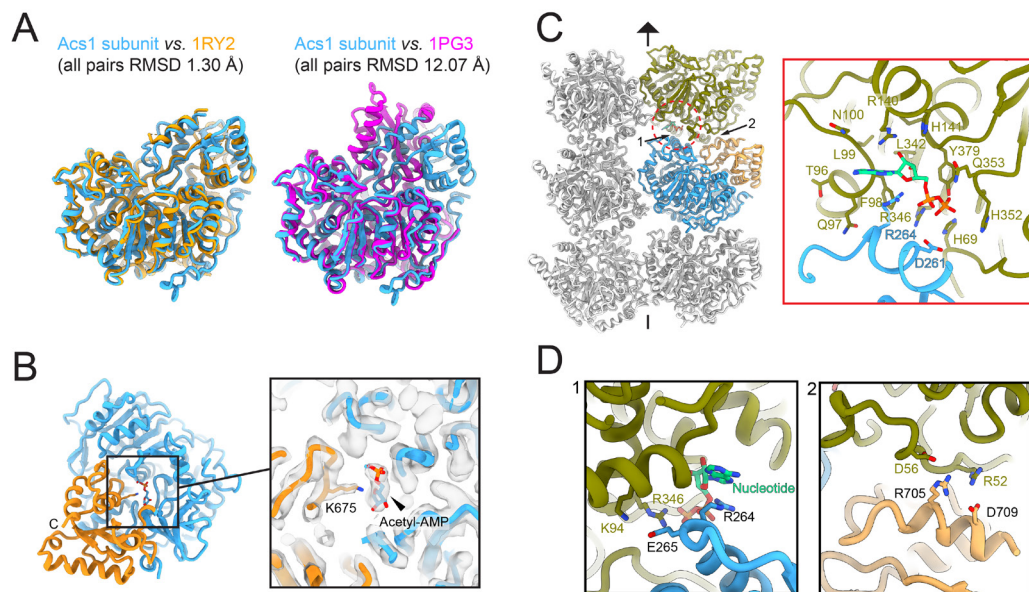

1112

1113 **Figure S8. Acs1 subunits bind to two metabolites to form the filament.**

1114 (A) Ribbon diagrams showing that the Acs1 subunit in the filament conformation fits the state that  
1115 accomplishes the first step of the enzymatic reaction. Structural superpositions show the structural  
1116 difference between Acs1 subunit from the filament conformation (blue) with the yeast Acs1 binary  
1117 complex (PDB entry: 1RY2<sup>36</sup>, orange, left) representing the first step of the enzymatic reaction,  
1118 compared to the bacterial ACS homolog ternary complex (PDB entry: 1PG3<sup>40</sup>, magenta, right)  
1119 representing the second step of the enzymatic reaction.

1120 (B) Ribbon and stick diagrams showing that the acetyl-AMP intermediate interacts with the catalytic  
1121 residue K675 of Acs1. The Acs1 structure is shown ribbon style and is color-coded as in Figure 5C,  
1122 whereas the acetyl-AMP intermediate is shown in stick style. The C-terminus of Acs1 is labeled. Zoom-  
1123 in on the catalytic site is shown on the right, highlighting the contact between the catalytic key residue  
1124 K675 and the acetyl-AMP intermediate. The density of Acs1 subunit is colored gray and is shown in  
1125 transparent, while the side chain of K675 is shown in stick style.

1126 (C) Ribbon and stick diagrams showing the metabolic nucleotide (potentially ADP) bound to two  
1127 consecutive Acs1 trimer layers. Three Acs1 trimer layers are color-coded as in Figure 5C and the 3-fold  
1128 axis is represented by a triangle. The binding site of the metabolic nucleotide is highlighted with a red  
1129 dashed circle and the zoom-in is shown to the right. The metabolic nucleotide and the side chains of the  
1130 contacting residues are labeled and are shown in stick style. Two interfaces between adjacent Acs1  
1131 subunits are marked (1 and 2) and the details are shown in panel (D).

1132 (D) Ribbon and stick diagrams showing that salt bridge pairs contribute to the Acs1 filament assembly.  
1133 Zoom-ins show the corresponding interfaces highlighted in panel (C). The metabolic nucleotide

1134 (potentially ADP) and the side chains of residues participating in salt bridge pairs are labeled and are  
1135 shown in stick style.  
1136



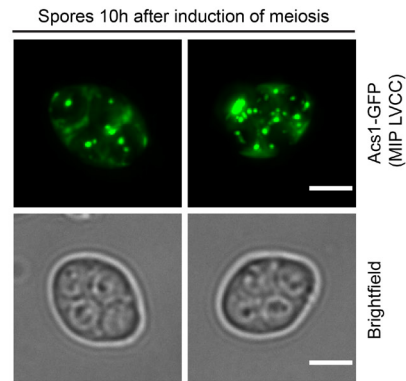

1137

1138 **Figure S9. Acs1 C-terminally tagged with GFP forms foci in ascospores.**

1139 Cells expressing Acs1-GFP from the endogenous promotor were sporulated and imaged by fluorescent  
1140 light microscopy. Shown are two representative images of maximum intensity z-projections (MIP) after  
1141 large volume computational clearing (LVCC) and the corresponding Brightfield image of the  
1142 ascospores. Scale bar: 3  $\mu$ m.

1143

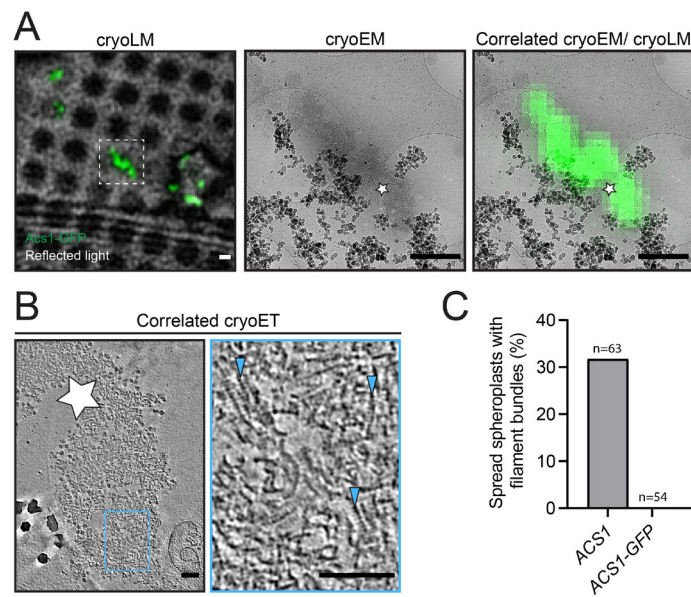

1144

1145 **Figure S10. *Acs1* C-terminally tagged with GFP forms short single filament aggregates but not**  
1146 **elaborate bundles.**

1147 **(A)** Correlation of *Acs1*-GFP signal in cryo-confocal light microscopy (cryoLM) with cryoEM. Left:  
1148 cryoLM of a *Acs1*-GFP rod from a meiotic spread yeast spheroplast (6 h after induction of meiosis) on  
1149 an EM grid. Shown is an overlay of maximum intensity projections of *Acs1*-GFP and reflected light of  
1150 the EM grid. Middle: the corresponding low resolution EM overview of the area highlighted in the left  
1151 image. Right: Overlay of the EM overview image with the corresponding *Acs1*-GFP signal from  
1152 cryoLM. Scale bars: 1  $\mu$ m. White star indicates where cryoET imaging was performed for panel **(B)**.

1153 **(B)** *Acs1*-GFP forms short ladder-like filament aggregates. Slices through the cryo-tomogram of the  
1154 corresponding area indicated by white stars in **(A)**. Note that short ladder-like filaments, visible in the  
1155 magnified view (blue box), form an aggregate, which colocalizes with the *Acs1*-GFP fluorescent signal  
1156 in **(A)**. Single filaments are highlighted with blue arrowheads in the magnified view. Shown are  
1157 projections of 9.15 nm thick slices. Scale bars: 100 nm.

1158 **(C)** No filament bundles are visible in *Acs1*-GFP spreads. Spread meiotic yeast spheroplasts (6 h after  
1159 induction of meiosis) for the indicated genotypes were analyzed by cryoEM as described in more detail  
1160 in Figure S7B. Shown are percentages of spreads containing *Acs1* filament bundles in EM images and  
1161 the total number of spreads (n) analyzed for each genotype are indicated. Note that the experiment was  
1162 performed together with the strains in Figure S7B. Therefore, the wild-type *ACS1* strain was re-used  
1163 in this figure.

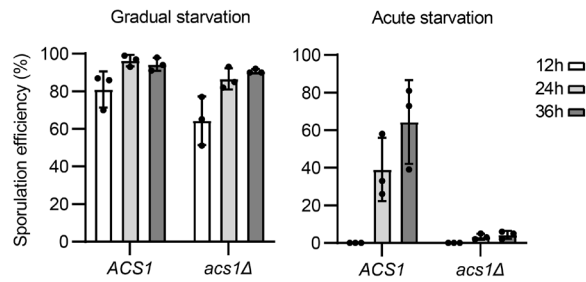

1164

1165 **Figure S11. Acs1 is needed for efficient sporulation after acute starvation.**

1166 Acs1 is needed for efficient sporulation after acute starvation. Yeast strains with the indicated genotypes  
1167 were induced to enter meiosis by transfer from YPD to SPM (acute starvation), or by transfer from YPD  
1168 to YPA to SPM (gradual starvation). The efficiency of ascospore formation was quantified by assessing  
1169 the morphology of 100 cells from three independent experiments after 12, 24 and 36 h in SPM.  
1170 Ascospore formation was considered successful if at least two spores were enclosed by a spore wall.  
1171 Plotted values show the mean  $\pm$  SD.

1172

1173

1174

## 1175 SUPPLEMENTARY TABLES

1176 **Table S1: cryoEM data statistical analysis**

|                                           | Acs1 filament                                    | Ald4 tetramer        |
|-------------------------------------------|--------------------------------------------------|----------------------|
| <b>Data collection and processing</b>     |                                                  |                      |
| Nominal magnification                     | 130,000                                          | 81,000               |
| Voltage (kV)                              | 300                                              |                      |
| Electron exposure (e <sup>-</sup> /Å)     | ~60                                              |                      |
| Defocus range (μm)                        | 1.2 - 2.8                                        |                      |
| Pixel size (Å/pixel)                      | 1.07 (binning = 1)                               | 1.10 (binning =1)    |
| Symmetry imposed                          | C3 + helical<br>(twist = 13.03°, rise = 53.61 Å) | D2                   |
| Final particles (No.)                     | 17,169                                           | 29,307               |
| Map resolution (Å)                        | 3.5                                              | 3.8                  |
| FSC threshold                             | 0.143                                            |                      |
| <b>Refinement</b>                         |                                                  |                      |
| Map sharpening B factor (Å <sup>2</sup> ) | -83                                              | -131                 |
| Model composition                         | (three layers)                                   |                      |
| Atoms                                     | 48177 (Hydrogens: 135)                           | 15416 (Hydrogens: 0) |
| Protein residues                          | 6084                                             | 1980                 |
| Chains                                    | 18                                               | 4                    |
| Ligands with number                       | 6R9: 9                                           | NAP: 4               |
| R.M.S deviations                          |                                                  |                      |
| Bond length (Å)                           | 0.022                                            | 0.019                |
| Bond angles (°)                           | 1.73                                             | 1.769                |
| Validation                                |                                                  |                      |
| MolProbity score                          | 1.50                                             | 1.27                 |
| Clashscore                                | 7.19                                             | 5.14                 |
| Rotamer outlier (%)                       | 0                                                | 0                    |
| Ramachandran plot                         |                                                  |                      |
| Favored (%)                               | 97.48                                            | 98.58                |
| Allowed (%)                               | 2.52                                             | 1.42                 |
| Outlier (%)                               | 0                                                | 0                    |
| Masked CC                                 | 0.77                                             | 0.77                 |

1177

1178

1179 **Table S2: Strain list**

| Strain                                       | Genotype*                                                            | Figure                                                     |
|----------------------------------------------|----------------------------------------------------------------------|------------------------------------------------------------|
| YML9796<br>YML15193                          | <i>ndt80Δ::HIS3</i>                                                  | 1A-D, 3A-E, S2, S3A-E, S4B-D,                              |
| YML9797<br>YML15194                          | <i>ndt80::HIS3 ZIP1::GFP(700)-HphMX4</i>                             | 1A-D, 4A-B, 4D, 5B-D, S1B, S5B-C, S6A-E, S7A, S7C-D, S8A-D |
| YML12473                                     | <i>ATP1-GFP::HIS3 ndt80Δ::HIS3</i>                                   | 1A-C                                                       |
| YML15200                                     | <i>ald4Δ::ALD4<sup>WT</sup>::LEU2::NATMX4</i>                        | 3F                                                         |
| YML15201                                     | <i>ald4Δ::ald4<sup>int</sup>::LEU2::NATMX4</i>                       | 3F                                                         |
| YML14301                                     | ** <i>MATalpha ald4Δ::NATMX4</i>                                     | 3G                                                         |
| YML14249                                     | ** <i>MATa ALD4-yeGFP::KITRP1</i>                                    | 3G                                                         |
| YML14486                                     | ** <i>MATa ald4Δ::ALD4<sup>WT</sup>-yeGFP::LEU2::TRP1::NATMX4</i>    | 3G                                                         |
| YML14717                                     | ** <i>MATalpha ald4Δ::ald4<sup>int</sup>-GFP::LEU2::TRP1::NATMX4</i> | 3G                                                         |
| YML10828                                     | <i>ZIP1-GFP(700)::HphMX4</i>                                         | 4C-D, 5B-D, S6A-E, S7A, S7C-D, S8A-D                       |
| YML10774<br>YML12475<br>YML12476<br>YML12477 | 'Wild-type'                                                          | 5F, 6C-D, S2, S4E, S5B, S7B, S9C, S11                      |
| YML12505<br>YML15195<br>YML15196             | <i>acs1Δ::KanMX</i>                                                  | 5F, 6D-E, 6G, S7B, S11                                     |
| YML14830<br>YML15203                         | <i>acs1Δ::ACSI<sup>WT</sup>::KITRP1::URA3::KanMX</i>                 | 5E-F, 6E                                                   |
| YML14832<br>YML15202                         | <i>acs1Δ::acs1<sup>R264W</sup>::KITRP1::URA3::KanMX</i>              | 5E-F, 6E                                                   |
| YML14833<br>YML15204                         | <i>acs1Δ::acs1<sup>K675A</sup>::KITRP1::URA3::KanMX</i>              | 5E-F, 6E                                                   |
| YML12463<br>YML12507                         | <i>acs1Δ::ACSI<sup>WT</sup>-GFP::TRP1::URA3::KanMX</i>               | 5G, 6C, S10C                                               |
| YML12511                                     | <i>acs1Δ::acs1<sup>K675A</sup>-GFP::TRP1::URA3::KanMX</i>            | 5G                                                         |
| YML12471<br>YML12509                         | <i>acs1Δ::acs1<sup>R264W</sup>-GFP::TRP1::URA3::KanMX</i>            | 5G                                                         |
| YML5909                                      | 'Wild-type'                                                          | 6A-B                                                       |
| YML15066                                     | <i>acs1Δ::ACSI<sup>WT</sup>::KITRP1</i>                              | 6G                                                         |
| YML15067                                     | <i>acs1Δ::acs1<sup>R264W</sup>::KITRP1</i>                           | 6G                                                         |
| YML15069                                     | <i>acs1Δ::acs1<sup>K675A</sup>::KITRP1</i>                           | 6G                                                         |
| YML4069                                      | ** <i>MATa</i>                                                       | 7A                                                         |
| YML15199                                     | ** <i>MATalpha acs1Δ::KanMX</i>                                      | 7B                                                         |
| YML14653                                     | ** <i>MATalpha acs1Δ::ACSI<sup>WT</sup>::KITRP1::URA3::KanMX</i>     | 7B                                                         |
| YML14612                                     | ** <i>MATalpha acs1Δ::acs1<sup>K675A</sup>::KITRP1::URA3::KanMX</i>  | 7B                                                         |
| YML14510                                     | ** <i>MATalpha acs1Δ::acs1<sup>R264W</sup>::KITRP1::URA3::KanMX</i>  | 7B                                                         |
| YML15198                                     | <i>ald4Δ::KANMX4</i>                                                 | S4E                                                        |
| YML5095                                      | <i>zip1Δ::KANMX4 ndt80Δ::HIS3</i>                                    | S5A, S7B                                                   |
| YML15197                                     | <i>ACSI-yeGFP::KITRP1</i>                                            | S9, S10A-B                                                 |

1180 \* Unless indicated, all strains are diploid SK1 derivatives (*MATa/ MATalpha ho::LYS2 ura3 leu2::hisG*  
1181 *trp1::hisG his3::hisG* or *ho::hisG leu2 ura3*) and homozygous for the genotype depicted in the table.

1182 \*\* haploid SK1 derivatives (*MATa* or *MATalpha ho::LYS2 ura3 leu2::hisG trp1::hisG his3::hisG* or  
1183 *ho::hisG leu2 ura3*)

1184

1185 **Table S3: Protein candidates for mitochondrial filaments**

1186 See separate Excel file

1187



## 1188 REFERENCES

- 1189 1. Lennon, J.T., and Jones, S.E. (2011). Microbial seed banks: the ecological and evolutionary  
1190 implications of dormancy. *Nat Rev Microbiol* 9, 119-130. 10.1038/nrmicro2504.
- 1191 2. Rittershaus, E.S., Baek, S.H., and Sasseti, C.M. (2013). The normalcy of dormancy: common  
1192 themes in microbial quiescence. *Cell Host Microbe* 13, 643-651. 10.1016/j.chom.2013.05.012.
- 1193 3. Aughey, G.N., and Liu, J.L. (2015). Metabolic regulation via enzyme filamentation. *Crit Rev*  
1194 *Biochem Mol Biol* 51, 282-293. 10.3109/10409238.2016.1172555.
- 1195 4. Garcia-Seisdedos, H., Empereur-Mot, C., Elad, N., and Levy, E.D. (2017). Proteins evolve on  
1196 the edge of supramolecular self-assembly. *Nature* 548, 244-247. 10.1038/nature23320.
- 1197 5. Hvorecny, K.L., and Kollman, J.M. (2023). Greater than the sum of parts:  
1198 Mechanisms of metabolic regulation by enzyme filaments. *Curr Opin Struct Biol* 79, 102530.  
1199 10.1016/j.sbi.2023.102530.
- 1200 6. Lynch, E.M., Kollman, J.M., and Webb, B.A. (2020). Filament formation by metabolic  
1201 enzymes-A new twist on regulation. *Curr Opin Cell Biol* 66, 28-33. 10.1016/j.ceb.2020.04.006.
- 1202 7. O'Connell, J.D., Zhao, A., Ellington, A.D., and Marcotte, E.M. (2012). Dynamic reorganization  
1203 of metabolic enzymes into intracellular bodies. *Annu Rev Cell Dev Biol* 28, 89-111.  
1204 10.1146/annurev-cellbio-101011-155841.
- 1205 8. Park, C.K., and Horton, N.C. (2019). Structures, functions, and mechanisms of filament forming  
1206 enzymes: a renaissance of enzyme filamentation. *Biophysical Reviews* 11, 927-994.  
1207 10.1007/s12551-019-00602-6.
- 1208 9. Simonet, J.C., Burrell, A.L., Kollman, J.M., and Peterson, J.R. (2020). Freedom of assembly:  
1209 metabolic enzymes come together. *Mol Biol Cell* 31, 1201-1205. 10.1091/mbc.E18-10-0675.
- 1210 10. Noree, C., Begovich, K., Samilo, D., Broyer, R., Monfort, E., and Wilhelm, J.E. (2019). A  
1211 quantitative screen for metabolic enzyme structures reveals patterns of assembly across the yeast  
1212 metabolic network. *Molecular Biology of the Cell* 30, 2721-2736. 10.1091/mbc.E19-04-0224.
- 1213 11. Narayanaswamy, R., Levy, M., Tschansky, M., Stovall, G.M., O'Connell, J.D., Mirrieles, J.,  
1214 Ellington, A.D., and Marcotte, E.M. (2009). Widespread reorganization of metabolic enzymes  
1215 into reversible assemblies upon nutrient starvation. *Proc Natl Acad Sci U S A* 106, 10147-  
1216 10152. 10.1073/pnas.0812771106.
- 1217 12. Noree, C., Sato, B.K., Broyer, R.M., and Wilhelm, J.E. (2010). Identification of novel filament-  
1218 forming proteins in *Saccharomyces cerevisiae* and *Drosophila melanogaster*. *J Cell Biol* 190,  
1219 541-551. 10.1083/jcb.201003001.
- 1220 13. Shen, Q.J., Kassim, H., Huang, Y., Li, H., Zhang, J., Li, G., Wang, P.Y., Yan, J., Ye, F., and  
1221 Liu, J.L. (2016). Filamentation of Metabolic Enzymes in *Saccharomyces cerevisiae*. *J Genet*  
1222 *Genomics* 43, 393-404. 10.1016/j.jgg.2016.03.008.
- 1223 14. Noree, C., Monfort, E., Shiau, A.K., and Wilhelm, J.E. (2014). Common regulatory control of  
1224 CTP synthase enzyme activity and filament formation. *Mol Biol Cell* 25, 2282-2290.  
1225 10.1091/mbc.E14-04-0912.
- 1226 15. Hansen, J.M., Horowitz, A., Lynch, E.M., Farrell, D.P., Quispe, J., DiMaio, F., and Kollman,  
1227 J.M. (2021). Cryo-EM structures of CTP synthase filaments reveal mechanism of pH-sensitive  
1228 assembly during budding yeast starvation. *Elife* 10. 10.7554/eLife.73368.
- 1229 16. Petrovska, I., Nüske, E., Munder, M.C., Kulasegaran, G., Malinowska, L., Kroschwald, S.,  
1230 Richter, D., Fahmy, K., Gibson, K., Verbavatz, J.M., and Alberti, S. (2014). Filament formation  
1231 by metabolic enzymes is a specific adaptation to an advanced state of cellular starvation. *Elife*  
1232 3. 10.7554/eLife.02409.

- 1233 17. Nüske, E., Marini, G., Richter, D., Leng, W., Bogdanova, A., Franzmann, T.M., Pigino, G., and  
1234 Alberti, S. (2020). Filament formation by the translation factor eIF2B regulates protein synthesis  
1235 in starved cells. *Biol Open* 9. 10.1242/bio.046391.
- 1236 18. Stoddard, P.R., Lynch, E.M., Farrell, D.P., Dosey, A.M., DiMaio, F., Williams, T.A., Kollman,  
1237 J.M., Murray, A.W., and Garner, E.C. (2020). Polymerization in the actin ATPase clan regulates  
1238 hexokinase activity in yeast. *Science* 367, 1039-1042. 10.1126/science.aay5359.
- 1239 19. Neiman, A.M. (2011). Sporulation in the budding yeast *Saccharomyces cerevisiae*. *Genetics*  
1240 189, 737-765. 10.1534/genetics.111.127126.
- 1241 20. Marston, A.L., and Amon, A. (2004). Meiosis: cell-cycle controls shuffle and deal. *Nat Rev*  
1242 *Mol Cell Biol* 5, 983-997. 10.1038/nrm1526.
- 1243 21. Beck, M., and Baumeister, W. (2016). Cryo-Electron Tomography: Can it Reveal the Molecular  
1244 Sociology of Cells in Atomic Detail? *Trends Cell Biol* 26, 825-837. 10.1016/j.tcb.2016.08.006.
- 1245 22. Young, L.N., and Villa, E. (2023). Bringing Structure to Cell Biology with Cryo-Electron  
1246 Tomography. *Annual Review of Biophysics* 52, 573-595. 10.1146/annurev-biophys-111622-  
1247 091327.
- 1248 23. Oelschlaegel, T., Schwickart, M., Matos, J., Bogdanova, A., Camasses, A., Havlis, J.,  
1249 Shevchenko, A., and Zachariae, W. (2005). The yeast APC/C subunit Mnd2 prevents premature  
1250 sister chromatid separation triggered by the meiosis-specific APC/C-Ama1. *Cell* 120, 773-788.  
1251 10.1016/j.cell.2005.01.032.
- 1252 24. Petronczki, M., Matos, J., Mori, S., Gregan, J., Bogdanova, A., Schwickart, M., Mechtler, K.,  
1253 Shirahige, K., Zachariae, W., and Nasmyth, K. (2006). Monopolar attachment of sister  
1254 kinetochores at meiosis I requires casein kinase 1. *Cell* 126, 1049-1064.  
1255 10.1016/j.cell.2006.07.029.
- 1256 25. Zachs, T., Schertel, A., Medeiros, J., Weiss, G.L., Hugener, J., Matos, J., and Pilhofer, M.  
1257 (2020). Fully automated, sequential focused ion beam milling for cryo-electron tomography.  
1258 *Elife* 9, e52286. 10.7554/eLife.52286.
- 1259 26. Xu, L., Ajimura, M., Padmore, R., Klein, C., and Kleckner, N. (1995). NDT80, a meiosis-  
1260 specific gene required for exit from pachytene in *Saccharomyces cerevisiae*. *Mol Cell Biol* 15,  
1261 6572-6581. 10.1128/mcb.15.12.6572.
- 1262 27. Loidl, J., Klein, F., and Engebrecht, J. (1997). Chapter 12 Genetic and Morphological  
1263 Approaches for the Analysis of Meiotic Chromosomes in Yeast. In *Methods in Cell Biology*,  
1264 M. Berrios, ed. (Academic Press), pp. 257-285. [https://doi.org/10.1016/S0091-679X\(08\)60882-1](https://doi.org/10.1016/S0091-679X(08)60882-1).
- 1266 28. Loidl, J., Nairz, K., and Klein, F. (1991). Meiotic chromosome synapsis in a haploid yeast.  
1267 *Chromosoma* 100, 221-228. 10.1007/bf00344155.
- 1268 29. Jumper, J., Evans, R., Pritzel, A., Green, T., Figurnov, M., Ronneberger, O., Tunyasuvunakool,  
1269 K., Bates, R., Žídek, A., Potapenko, A., et al. (2021). Highly accurate protein structure  
1270 prediction with AlphaFold. *Nature* 596, 583-589. 10.1038/s41586-021-03819-2.
- 1271 30. Varadi, M., Anyango, S., Deshpande, M., Nair, S., Natassia, C., Yordanova, G., Yuan, D., Stroe,  
1272 O., Wood, G., Laydon, A., et al. (2022). AlphaFold Protein Structure Database: massively  
1273 expanding the structural coverage of protein-sequence space with high-accuracy models.  
1274 *Nucleic Acids Research* 50, D439-D444. 10.1093/nar/gkab1061.
- 1275 31. Wettstein, R., Hugener, J., Gillet, L., Hernández-Armenta, Y., Henggeler, A., Xu, J., Van  
1276 Gerwen, J., Wollweber, F., Arter, M., Aebersold, R., Beltrao, P., Pilhofer, M., and Matos, J.  
1277 (unpublished). Waves of regulated protein expression and phosphorylation functionally rewire  
1278 the proteome to drive gametogenesis.
- 1279 32. Morgenstern, M., Stiller, S.B., Lübbert, P., Peikert, C.D., Dannenmaier, S., Drepper, F., Weill,  
1280 U., Höß, P., Feuerstein, R., Gebert, M., et al. (2017). Definition of a High-Confidence

- 1281 Mitochondrial Proteome at Quantitative Scale. *Cell Rep* 19, 2836-2852.  
1282 10.1016/j.celrep.2017.06.014.
- 1283 33. Perez-Miller, S.J., and Hurley, T.D. (2003). Coenzyme Isomerization Is Integral to Catalysis in  
1284 Aldehyde Dehydrogenase. *Biochemistry* 42, 7100-7109. 10.1021/bi034182w.
- 1285 34. Misonou, Y., Kikuchi, M., Sato, H., Inai, T., Kuroiwa, T., Tanaka, K., and Miyakawa, I. (2014).  
1286 Aldehyde dehydrogenase, Ald4p, is a major component of mitochondrial fluorescent inclusion  
1287 bodies in the yeast *Saccharomyces cerevisiae*. *Biol Open* 3, 387-396. 10.1242/bio.20147138.
- 1288 35. Holm, L. (2022). Dali server: structural unification of protein families. *Nucleic Acids Research*  
1289 50, W210-W215. 10.1093/nar/gkac387.
- 1290 36. Jogl, G., and Tong, L. (2004). Crystal Structure of Yeast Acetyl-Coenzyme A Synthetase in  
1291 Complex with AMP. *Biochemistry* 43, 1425-1431. 10.1021/bi035911a.
- 1292 37. Ma, O.X., Chong, W.G., Lee, J.K.E., Cai, S., Siebert, C.A., Howe, A., Zhang, P., Shi, J., Surana,  
1293 U., and Gan, L. (2022). Cryo-ET detects bundled triple helices but not ladders in meiotic  
1294 budding yeast. *PLoS One* 17, e0266035. 10.1371/journal.pone.0266035.
- 1295 38. Takagi, T., Osumi, M., and Shinohara, A. (2021). Ultrastructural analysis in yeast reveals a  
1296 meiosis-specific actin-containing nuclear bundle. *Commun Biol* 4, 1009. 10.1038/s42003-021-  
1297 02545-9.
- 1298 39. Starai, V.J., and Escalante-Semerena, J.C. (2004). Acetyl-coenzyme A synthetase (AMP  
1299 forming). *Cellular and Molecular Life Sciences CMLS* 61, 2020-2030. 10.1007/s00018-004-  
1300 3448-x.
- 1301 40. Gulick, A.M., Starai, V.J., Horswill, A.R., Homick, K.M., and Escalante-Semerena, J.C. (2003).  
1302 The 1.75 Å Crystal Structure of Acetyl-CoA Synthetase Bound to Adenosine-5'-  
1303 propylphosphate and Coenzyme A. *Biochemistry* 42, 2866-2873. 10.1021/bi0271603.
- 1304 41. Starai, V.J., Celic, I., Cole, R.N., Boeke, J.D., and Escalante-Semerena, J.C. (2002). Sir2-  
1305 dependent activation of acetyl-CoA synthetase by deacetylation of active lysine. *Science* 298,  
1306 2390-2392. 10.1126/science.1077650.
- 1307 42. Van den Berg, M.A., and Steensma, H.Y. (1995). ACS2, a *Saccharomyces cerevisiae* gene  
1308 encoding acetyl-coenzyme A synthetase, essential for growth on glucose. *Eur J Biochem* 231,  
1309 704-713. 10.1111/j.1432-1033.1995.tb20751.x.
- 1310 43. Takahashi, H., McCaffery, J.M., Irizarry, R.A., and Boeke, J.D. (2006). Nucleocytosolic Acetyl-  
1311 Coenzyme A Synthetase Is Required for Histone Acetylation and Global Transcription.  
1312 *Molecular Cell* 23, 207-217. <https://doi.org/10.1016/j.molcel.2006.05.040>.
- 1313 44. Mews, P., Donahue, G., Drake, A.M., Luczak, V., Abel, T., and Berger, S.L. (2017). Acetyl-  
1314 CoA synthetase regulates histone acetylation and hippocampal memory. *Nature* 546, 381-386.  
1315 10.1038/nature22405.
- 1316 45. Vasiliou, V., Pappa, A., and Petersen, D.R. (2000). Role of aldehyde dehydrogenases in  
1317 endogenous and xenobiotic metabolism. *Chemico-Biological Interactions* 129, 1-19.  
1318 [https://doi.org/10.1016/S0009-2797\(00\)00211-8](https://doi.org/10.1016/S0009-2797(00)00211-8).
- 1319 46. Schug, Z.T., Peck, B., Jones, D.T., Zhang, Q., Grosskurth, S., Alam, I.S., Goodwin, L.M.,  
1320 Smethurst, E., Mason, S., Blyth, K., et al. (2015). Acetyl-CoA synthetase 2 promotes acetate  
1321 utilization and maintains cancer cell growth under metabolic stress. *Cancer Cell* 27, 57-71.  
1322 10.1016/j.ccell.2014.12.002.
- 1323 47. Shortall, K., Djeghader, A., Magner, E., and Soulimane, T. (2021). Insights into Aldehyde  
1324 Dehydrogenase Enzymes: A Structural Perspective. *Frontiers in Molecular Biosciences* 8.  
1325 10.3389/fmolb.2021.659550.

- 1326 48. Kratzer, S., and Schuller, H.J. (1997). Transcriptional control of the yeast acetyl-CoA synthetase  
1327 gene, ACS1, by the positive regulators CAT8 and ADR1 and the pleiotropic repressor UME6.  
1328 *Molecular microbiology* 26, 631-641. 10.1046/j.1365-2958.1997.5611937.x.
- 1329 49. Jacobson, M.K., and Bernofsky, C. (1974). Mitochondrial acetaldehyde dehydrogenase from  
1330 *Saccharomyces cerevisiae*. *Biochimica et biophysica acta* 350, 277-291. 10.1016/0005-  
1331 2744(74)90502-6.
- 1332 50. Munder, M.C., Midtvedt, D., Franzmann, T., Nüske, E., Otto, O., Herbig, M., Ulbricht, E.,  
1333 Müller, P., Taubenberger, A., Maharana, S., et al. (2016). A pH-driven transition of the  
1334 cytoplasm from a fluid- to a solid-like state promotes entry into dormancy. *Elife* 5, e09347.  
1335 10.7554/eLife.09347.
- 1336 51. Joyner, R.P., Tang, J.H., Helenius, J., Dultz, E., Brune, C., Holt, L.J., Huet, S., Müller, D.J., and  
1337 Weis, K. (2016). A glucose-starvation response regulates the diffusion of macromolecules. *Elife*  
1338 5, e09376. 10.7554/eLife.09376.
- 1339 52. Walther, T., Létisse, F., Peyriga, L., Alkim, C., Liu, Y., Lardenois, A., Martin-Yken, H., Portais,  
1340 J.C., Primig, M., and François, J. (2014). Developmental stage dependent metabolic regulation  
1341 during meiotic differentiation in budding yeast. *BMC Biol* 12, 60. 10.1186/s12915-014-0060-  
1342 x.
- 1343 53. Ray, D., and Ye, P. (2013). Characterization of the metabolic requirements in yeast meiosis.  
1344 *PloS one* 8, e63707. 10.1371/journal.pone.0063707.
- 1345 54. Shvedunova, M., and Akhtar, A. (2022). Modulation of cellular processes by histone and non-  
1346 histone protein acetylation. *Nature Reviews Molecular Cell Biology* 23, 329-349.  
1347 10.1038/s41580-021-00441-y.
- 1348 55. Wang, F., Zhang, R., Feng, W., Tsuchiya, D., Ballew, O., Li, J., Denic, V., and Lacefield, S.  
1349 (2020). Autophagy of an Amyloid-like Translational Repressor Regulates Meiotic Exit. *Dev*  
1350 *Cell* 52, 141-151 e145. 10.1016/j.devcel.2019.12.017.
- 1351 56. O'Reilly, F.J., Xue, L., Graziadei, A., Sinn, L., Lenz, S., Tegunov, D., Blötz, C., Singh, N.,  
1352 Hagen, W.J.H., Cramer, P., et al. (2020). In-cell architecture of an actively transcribing-  
1353 translating expressome. *Science* 369, 554-557. 10.1126/science.abb3758.
- 1354 57. Xue, L., Lenz, S., Zimmermann-Kogadeeva, M., Tegunov, D., Cramer, P., Bork, P., Rappsilber,  
1355 J., and Mahamid, J. (2022). Visualizing translation dynamics at atomic detail inside a bacterial  
1356 cell. *Nature* 610, 205-211. 10.1038/s41586-022-05255-2.
- 1357 58. Hoffmann, P.C., Kreysing, J.P., Khusainov, I., Tuijtel, M.W., Welsch, S., and Beck, M. (2022).  
1358 Structures of the eukaryotic ribosome and its translational states in situ. *Nature Communications*  
1359 13, 7435. 10.1038/s41467-022-34997-w.
- 1360 59. Xing, H., Taniguchi, R., Khusainov, I., Kreysing, J.P., Welsch, S., Turoňová, B., and Beck, M.  
1361 (2023). Translation dynamics in human cells visualized at high resolution reveal cancer drug  
1362 action. *Science* 381, 70-75. 10.1126/science.adh1411.
- 1363 60. Ho, C.M., Li, X., Lai, M., Terwilliger, T.C., Beck, J.R., Wohlschlegel, J., Goldberg, D.E.,  
1364 Fitzpatrick, A.W.P., and Zhou, Z.H. (2020). Bottom-up structural proteomics: cryoEM of  
1365 protein complexes enriched from the cellular milieu. *Nat Methods* 17, 79-85. 10.1038/s41592-  
1366 019-0637-y.
- 1367 61. Skalidis, I., Kyrilis, F.L., Tüting, C., Hamdi, F., Chojnowski, G., and Kastritis, P.L. (2022).  
1368 Cryo-EM and artificial intelligence visualize endogenous protein community members.  
1369 *Structure* 30, 575-589.e576. 10.1016/j.str.2022.01.001.
- 1370 62. Tüting, C., Kyrilis, F.L., Müller, J., Sorokina, M., Skalidis, I., Hamdi, F., Sadian, Y., and  
1371 Kastritis, P.L. (2021). Cryo-EM snapshots of a native lysate provide structural insights into a  
1372 metabolon-embedded transacetylase reaction. *Nat Commun* 12, 6933. 10.1038/s41467-021-  
1373 27287-4.



- 1374 63. Matos, J., Lipp, J.J., Bogdanova, A., Guillot, S., Okaz, E., Junqueira, M., Shevchenko, A., and  
1375 Zachariae, W. (2008). Dbf4-dependent CDC7 kinase links DNA replication to the segregation  
1376 of homologous chromosomes in meiosis I. *Cell* *135*, 662-678. S0092-8674(08)01363-9 [pii]  
1377 10.1016/j.cell.2008.10.026.
- 1378 64. Scherthan, H., Wang, H., Adelfalk, C., White, E.J., Cowan, C., Cande, W.Z., and Kaback, D.B.  
1379 (2007). Chromosome mobility during meiotic prophase in *Saccharomyces cerevisiae*. *Proc Natl*  
1380 *Acad Sci U S A* *104*, 16934-16939. 10.1073/pnas.0704860104.
- 1381 65. Giaever, G., Chu, A.M., Ni, L., Connelly, C., Riles, L., Véronneau, S., Dow, S., Lucau-Danila,  
1382 A., Anderson, K., André, B., et al. (2002). Functional profiling of the *Saccharomyces cerevisiae*  
1383 genome. *Nature* *418*, 387-391. 10.1038/nature00935.
- 1384 66. Knop, M., Siegers, K., Pereira, G., Zachariae, W., Winsor, B., Nasmyth, K., and Schiebel, E.  
1385 (1999). Epitope tagging of yeast genes using a PCR-based strategy: more tags and improved  
1386 practical routines. *Yeast* *15*, 963-972. 10.1002/(sici)1097-0061(199907)15:10b<963::Aid-  
1387 yea399>3.0.Co;2-w.
- 1388 67. Schindelin, J., Arganda-Carreras, I., Frise, E., Kaynig, V., Longair, M., Pietzsch, T., Preibisch,  
1389 S., Rueden, C., Saalfeld, S., Schmid, B., et al. (2012). Fiji: an open-source platform for  
1390 biological-image analysis. *Nat Methods* *9*, 676-682. 10.1038/nmeth.2019.
- 1391 68. Wild, P., Susperregui, A., Piazza, I., Dörig, C., Oke, A., Arter, M., Yamaguchi, M., Hilditch,  
1392 A.T., Vuina, K., Chan, K.C., et al. (2019). Network Rewiring of Homologous Recombination  
1393 Enzymes during Mitotic Proliferation and Meiosis. *Mol Cell* *75*, 859-874.e854.  
1394 10.1016/j.molcel.2019.06.022.
- 1395 69. Salah, S.-M., and Nasmyth, K. (2000). Destruction of the securin Pds1p occurs at the onset of  
1396 anaphase during both meiotic divisions in yeast. *Chromosoma* *109*, 27-34.  
1397 10.1007/s004120050409.
- 1398 70. Matos, J., Blanco, Miguel G., Maslen, S., Skehel, J.M., and West, Stephen C. (2011).  
1399 Regulatory Control of the Resolution of DNA Recombination Intermediates during Meiosis and  
1400 Mitosis. *Cell* *147*, 158-172. <https://doi.org/10.1016/j.cell.2011.08.032>.
- 1401 71. Faelber, K., Dietrich, L., Noel, J.K., Wollweber, F., Pfitzner, A.K., Mühleip, A., Sánchez, R.,  
1402 Kudryashev, M., Chiaruttini, N., Lilie, H., et al. (2019). Structure and assembly of the  
1403 mitochondrial membrane remodelling GTPase Mgm1. *Nature* *571*, 429-433. 10.1038/s41586-  
1404 019-1372-3.
- 1405 72. Iancu, C.V., Tivol, W.F., Schooler, J.B., Dias, D.P., Henderson, G.P., Murphy, G.E., Wright,  
1406 E.R., Li, Z., Yu, Z., Briegel, A., et al. (2006). Electron cryotomography sample preparation  
1407 using the Vitrobot. *Nat Protoc* *1*, 2813-2819. 10.1038/nprot.2006.432.
- 1408 73. Tivol, W.F., Briegel, A., and Jensen, G.J. (2008). An improved cryogen for plunge freezing.  
1409 *Microsc Microanal* *14*, 375-379. 10.1017/S1431927608080781.
- 1410 74. Schorb, M., and Briggs, J.A.G. (2014). Correlated cryo-fluorescence and cryo-electron  
1411 microscopy with high spatial precision and improved sensitivity. *Ultramicroscopy* *143*, 24-32.  
1412 <https://doi.org/10.1016/j.ultramic.2013.10.015>.
- 1413 75. Mastronarde, D.N. (2005). Automated electron microscope tomography using robust prediction  
1414 of specimen movements. *J Struct Biol* *152*, 36-51. 10.1016/j.jsb.2005.07.007.
- 1415 76. Kremer, J.R., Mastronarde, D.N., and McIntosh, J.R. (1996). Computer visualization of three-  
1416 dimensional image data using IMOD. *J Struct Biol* *116*, 71-76. 10.1006/jsbi.1996.0013.
- 1417 77. Tegunov, D., and Cramer, P. (2019). Real-time cryo-electron microscopy data preprocessing  
1418 with Warp. *Nature Methods* *16*, 1146-1152. 10.1038/s41592-019-0580-y.
- 1419 78. Heebner, J.E., Purnell, C., Hylton, R.K., Marsh, M., Grillo, M.A., and Swulius, M.T. (2022).  
1420 Deep Learning-Based Segmentation of Cryo-Electron Tomograms. *J Vis Exp*. 10.3791/64435.

- 1421 79. Pettersen, E.F., Goddard, T.D., Huang, C.C., Meng, E.C., Couch, G.S., Croll, T.I., Morris, J.H.,  
1422 and Ferrin, T.E. (2021). UCSF ChimeraX: Structure visualization for researchers, educators,  
1423 and developers. *Protein Sci* 30, 70-82. 10.1002/pro.3943.
- 1424 80. Castaño-Díez, D., Kudryashev, M., Arbeit, M., and Stahlberg, H. (2012). Dynamo: a flexible,  
1425 user-friendly development tool for subtomogram averaging of cryo-EM data in high-  
1426 performance computing environments. *J Struct Biol* 178, 139-151. 10.1016/j.jsb.2011.12.017.
- 1427 81. Rosenthal, P.B., and Henderson, R. (2003). Optimal determination of particle orientation,  
1428 absolute hand, and contrast loss in single-particle electron cryomicroscopy. *J Mol Biol* 333, 721-  
1429 745. 10.1016/j.jmb.2003.07.013.
- 1430 82. Scheres, S.H.W. (2012). RELION: Implementation of a Bayesian approach to cryo-EM  
1431 structure determination. *Journal of Structural Biology* 180, 519-530.  
1432 <https://doi.org/10.1016/j.jsb.2012.09.006>.
- 1433 83. Zheng, S.Q., Palovcak, E., Armache, J.-P., Verba, K.A., Cheng, Y., and Agard, D.A. (2017).  
1434 MotionCor2: anisotropic correction of beam-induced motion for improved cryo-electron  
1435 microscopy. *Nature Methods* 14, 331-332. 10.1038/nmeth.4193.
- 1436 84. Zhang, K. (2016). Gctf: Real-time CTF determination and correction. *J Struct Biol* 193, 1-12.  
1437 10.1016/j.jsb.2015.11.003.
- 1438 85. Zivanov, J., Nakane, T., Forsberg, B.O., Kimanius, D., Hagen, W.J.H., Lindahl, E., and Scheres,  
1439 S.H.W. (2018). New tools for automated high-resolution cryo-EM structure determination in  
1440 RELION-3. *Elife* 7, e42166. 10.7554/eLife.42166.
- 1441 86. He, S., and Scheres, S.H.W. (2017). Helical reconstruction in RELION. *Journal of Structural*  
1442 *Biology* 198, 163-176. <https://doi.org/10.1016/j.jsb.2017.02.003>.
- 1443 87. Sanchez-Garcia, R., Gomez-Blanco, J., Cuervo, A., Carazo, J.M., Sorzano, C.O.S., and Vargas,  
1444 J. (2021). DeepEMhancer: a deep learning solution for cryo-EM volume post-processing.  
1445 *Communications Biology* 4, 874. 10.1038/s42003-021-02399-1.
- 1446 88. Emsley, P., Lohkamp, B., Scott, W.G., and Cowtan, K. (2010). Features and development of  
1447 Coot. *Acta Crystallogr D Biol Crystallogr* 66, 486-501. 10.1107/s0907444910007493.
- 1448 89. Song, Y., DiMaio, F., Wang, R.Y., Kim, D., Miles, C., Brunette, T., Thompson, J., and Baker,  
1449 D. (2013). High-resolution comparative modeling with RosettaCM. *Structure* 21, 1735-1742.  
1450 10.1016/j.str.2013.08.005.
- 1451 90. Adams, P.D., Afonine, P.V., Bunkóczi, G., Chen, V.B., Davis, I.W., Echols, N., Headd, J.J.,  
1452 Hung, L.W., Kapral, G.J., Grosse-Kunstleve, R.W., et al. (2010). PHENIX: a comprehensive  
1453 Python-based system for macromolecular structure solution. *Acta Crystallogr D Biol*  
1454 *Crystallogr* 66, 213-221. 10.1107/s0907444909052925.
- 1455 91. Krissinel, E., and Henrick, K. (2007). Inference of macromolecular assemblies from crystalline  
1456 state. *J Mol Biol* 372, 774-797. 10.1016/j.jmb.2007.05.022.
- 1457 92. Gouet, P., Courcelle, E., Stuart, D.I., and Métoz, F. (1999). ESPript: analysis of multiple  
1458 sequence alignments in PostScript. *Bioinformatics* 15, 305-308.  
1459 10.1093/bioinformatics/15.4.305.
- 1460
